# Supplementary material for: Meso-tris(2-furyl/2-thienyl) substituted porphyrin–ferrocene ‘click’ conjugates: synthesis, experimental, and computational studies
Source: Royal Society of Chemistry journal article supplement (doi:10.1039/d4nj01788a), 2024-01-01
Supplement: d4nj01788a1.pdf [file d4nj01788a1.pdf]

## Supporting Information

### ***Meso*-tris(2-furyl/2-thienyl) substituted porphyrin-ferrocene ‘click’ conjugates: Synthesis, experimental and computational studies**

Sahana Nagesh Shet,<sup>a</sup> Mahendra Patil,<sup>b\*</sup> Vijayendra S. Shetti<sup>a\*</sup>

<sup>a</sup> Department of Chemistry, National Institute of Technology Karnataka, Surathkal-575025, India

[shettivs@nitk.edu.in](mailto:shettivs@nitk.edu.in)

<sup>b</sup> *UM-DAE* Centre for Excellence in Basic Sciences, Nalanda, University of Mumbai, Vidyanagari Campus, Santacruz (East), Mumbai – 400098, India

[mahendra.patil@cbs.ac.in](mailto:mahendra.patil@cbs.ac.in)

---

---

#### Contents

|                                                                      |     |
|----------------------------------------------------------------------|-----|
| <b>Figure S1.</b> <sup>1</sup> H NMR spectrum of <b>1</b> .....      | S3  |
| <b>Figure S2.</b> <sup>13</sup> C NMR spectrum of <b>1</b> .....     | S4  |
| <b>Figure S3.</b> ES MS spectrum of <b>1</b> .....                   | S5  |
| <b>Figure S4.</b> <sup>1</sup> H NMR spectrum of <b>3</b> .....      | S6  |
| <b>Figure S5.</b> <sup>13</sup> C NMR spectrum of <b>3</b> .....     | S7  |
| <b>Figure S6.</b> ES MS spectrum of <b>3</b> .....                   | S8  |
| <b>Figure S7.</b> <sup>1</sup> H NMR spectrum of <b>5</b> .....      | S9  |
| <b>Figure S8.</b> <sup>13</sup> C NMR spectrum of <b>5</b> .....     | S10 |
| <b>Figure S9.</b> ES MS spectrum of <b>5</b> .....                   | S11 |
| <b>Figure S10.</b> <sup>1</sup> H NMR spectrum of <b>6</b> .....     | S12 |
| <b>Figure S11.</b> <sup>13</sup> C NMR spectrum of <b>6</b> .....    | S13 |
| <b>Figure S12.</b> LCMS QTOF spectrum of <b>6</b> .....              | S14 |
| <b>Figure S13.</b> <sup>1</sup> H NMR spectrum of <b>8</b> .....     | S15 |
| <b>Figure S14.</b> <sup>13</sup> C NMR spectrum of <b>8</b> .....    | S16 |
| <b>Figure S15.</b> LCMS QTOF spectrum of <b>8</b> .....              | S17 |
| <b>Figure S16.</b> <sup>1</sup> H NMR spectrum of <b>Zn-8</b> .....  | S18 |
| <b>Figure S17.</b> <sup>13</sup> C NMR spectrum of <b>Zn-8</b> ..... | S19 |
| <b>Figure S18.</b> LCMS QTOF spectrum of <b>Zn-8</b> .....           | S20 |

|                                                                                          |     |
|------------------------------------------------------------------------------------------|-----|
| <b>Figure S19.</b> $^1\text{H}$ NMR spectrum of <b>9</b> .....                           | S21 |
| <b>Figure S20.</b> $^{13}\text{C}$ NMR spectrum of <b>9</b> .....                        | S22 |
| <b>Figure S21.</b> ES MS spectrum of <b>9</b> .....                                      | S23 |
| <b>Figure S22.</b> $^1\text{H}$ NMR spectrum of <b>Zn-9</b> .....                        | S24 |
| <b>Figure S23.</b> $^{13}\text{C}$ NMR spectrum of <b>Zn-9</b> .....                     | S25 |
| <b>Figure S24.</b> LCMS QTOF spectrum of <b>Zn-9</b> .....                               | S26 |
| <b>Table S1.</b> The selected dihedral angles (in $^\circ$ ) .....                       | S27 |
| <b>Table S2.</b> Optimized Geometries (Cartesian coordinates) of ‘click’ conjugates..... | S27 |

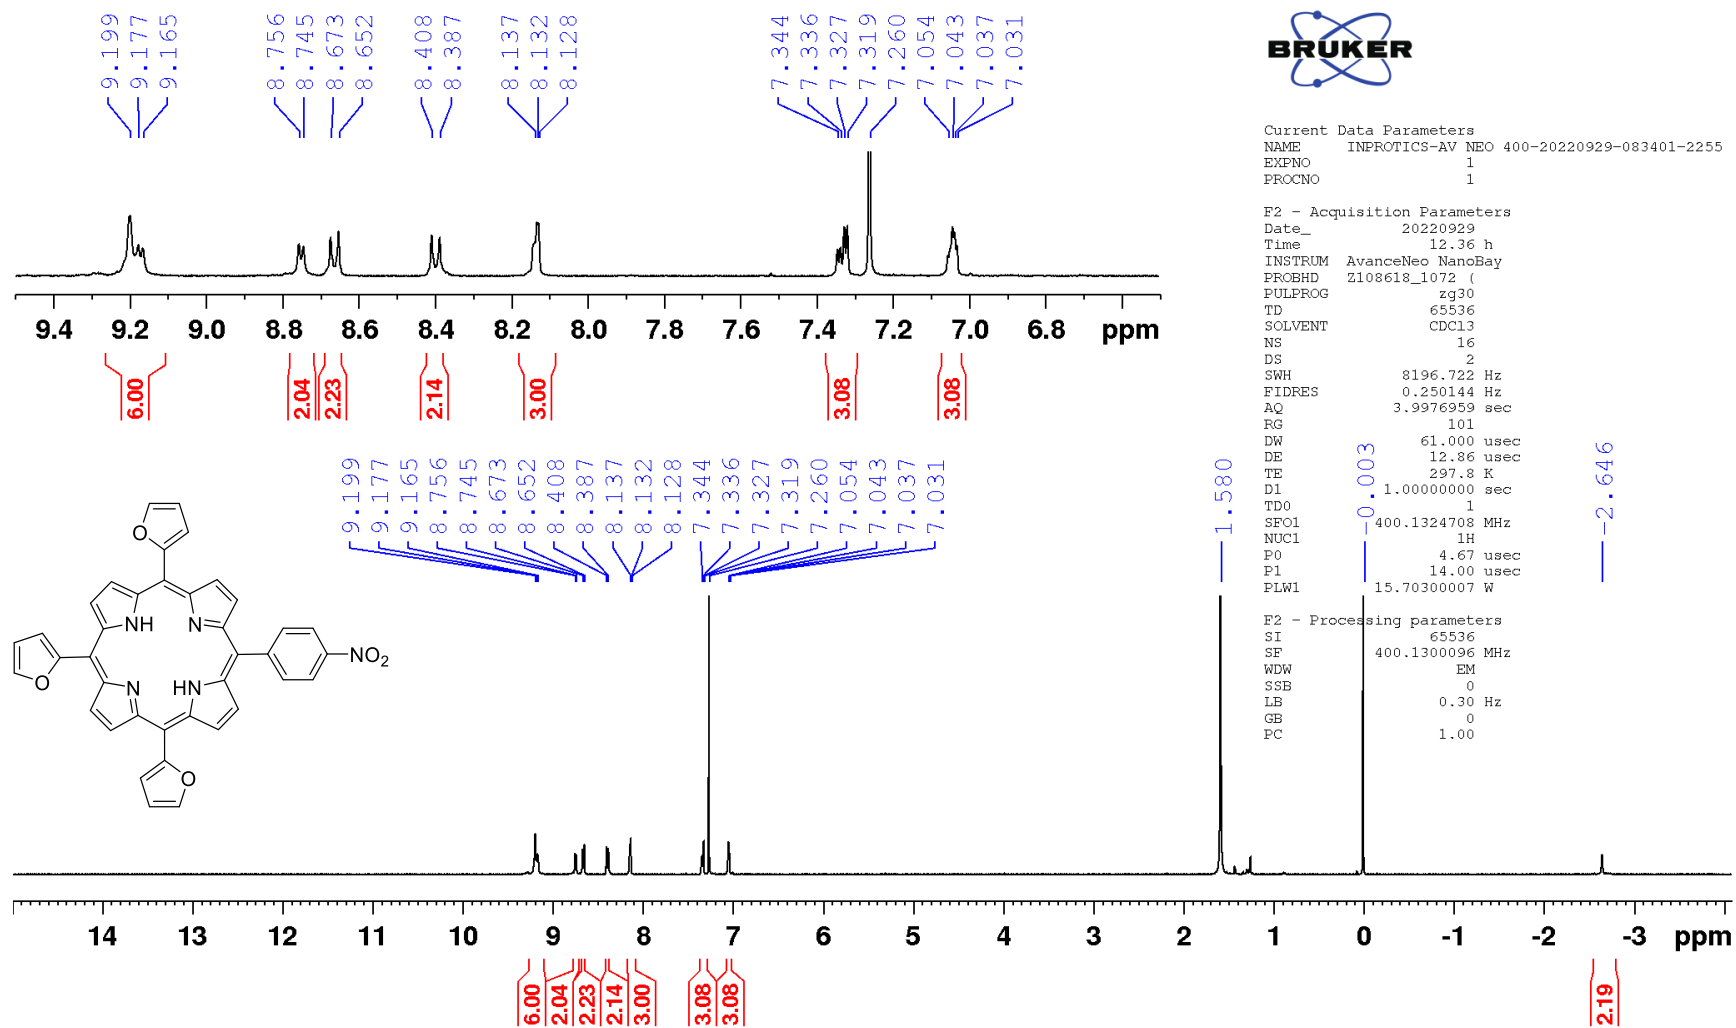

Figure S1. <sup>1</sup>H NMR spectrum of **1**

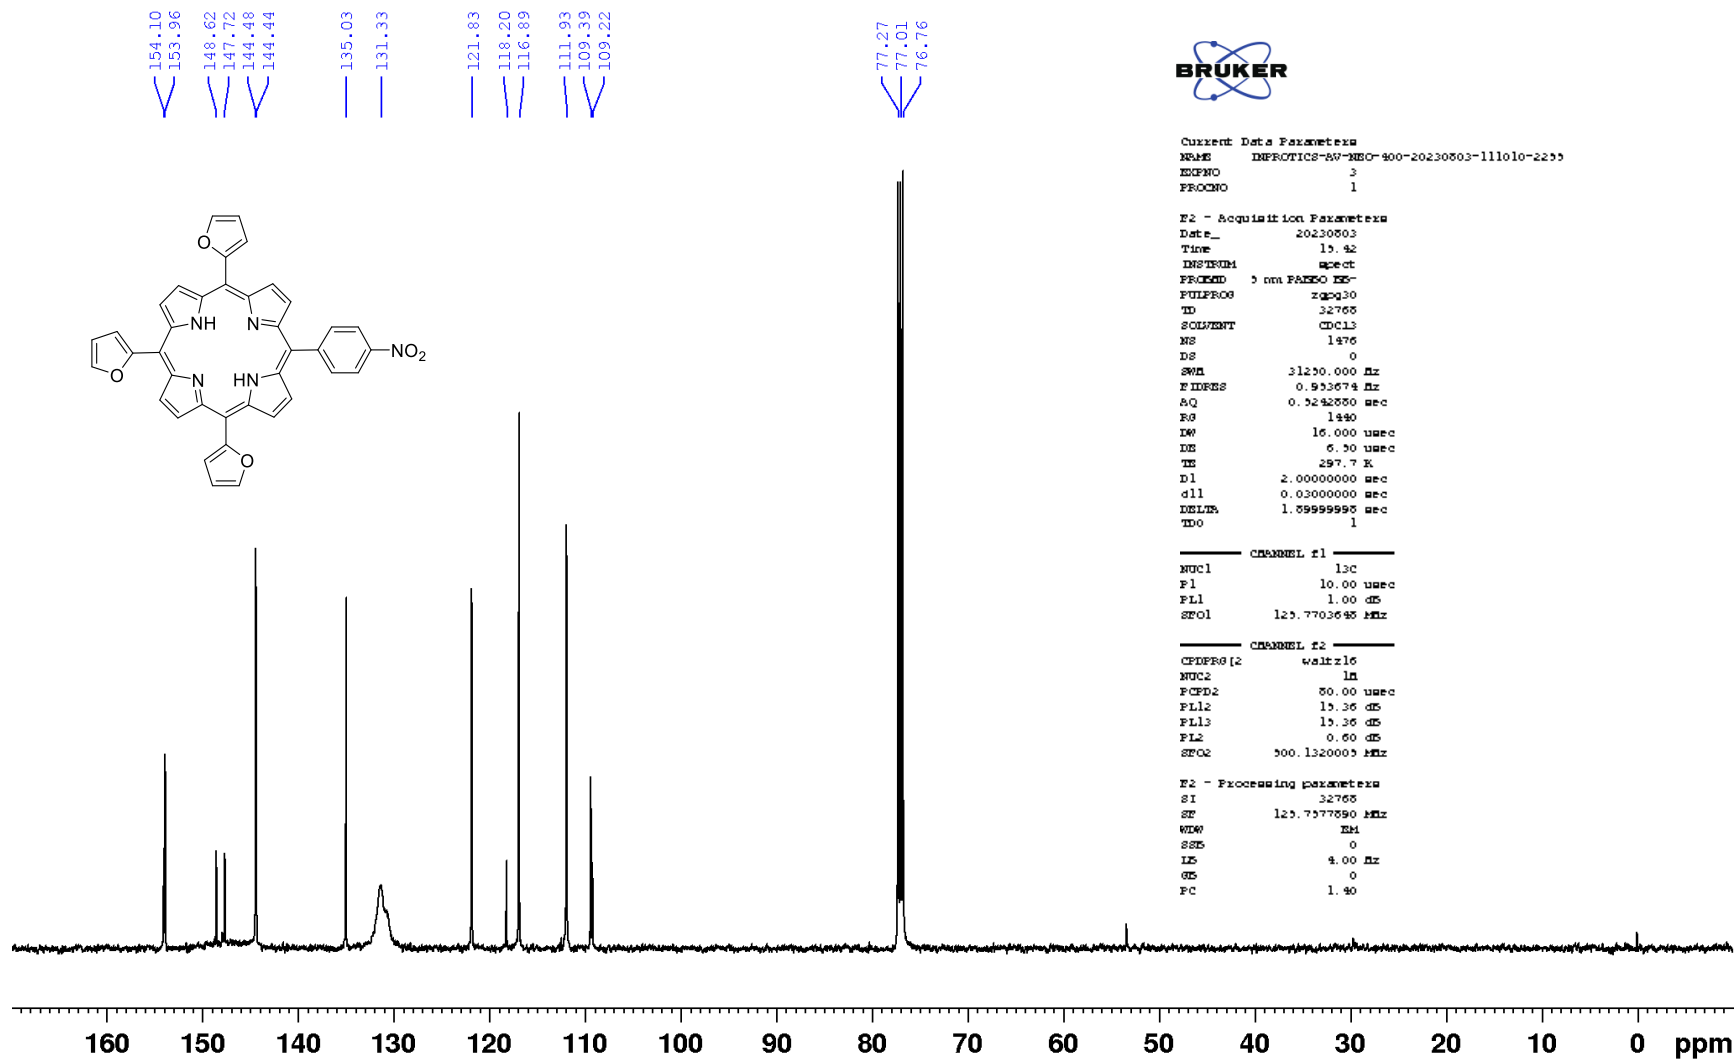

Figure S2. <sup>13</sup>C NMR spectrum of 1

## DEPARTMENT OF CHEMISTRY, I.I.T.(B)

## Analysis Info

Analysis Name D:\Data\APR-24\MR-SB-VSS-SNS-23.d  
 Method Naformat\_pos\_1000.m  
 Sample Name MR-SB-VSS-SNS-23  
 Comment C38H23N5O5

Acquisition Date 4/15/2024 11:50:40 AM

Operator iitb  
 Instrument maXis impact 282001.00081

## Acquisition Parameter

| Source Type | ESI        | Ion Polarity         | Positive | Set Nebulizer    | 0.3 Bar   |
|-------------|------------|----------------------|----------|------------------|-----------|
| Focus       | Not active | Set Capillary        | 3700 V   | Set Dry Heater   | 180 °C    |
| Scan Begin  | 50 m/z     | Set End Plate Offset | -500 V   | Set Dry Gas      | 4.0 l/min |
| Scan End    | 1000 m/z   | Set Charging Voltage | 2000 V   | Set Divert Valve | Source    |
|             |            | Set Corona           | 0 nA     | Set APCI Heater  | 0 °C      |

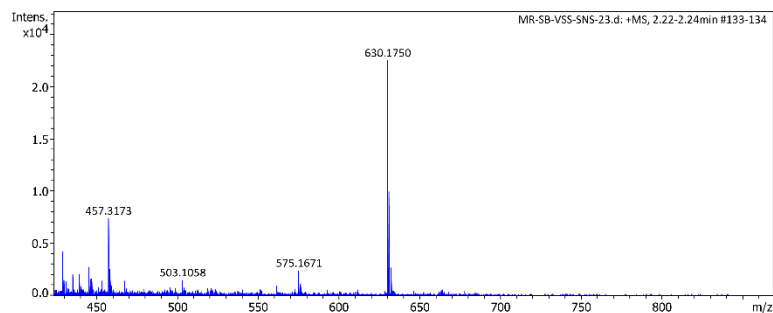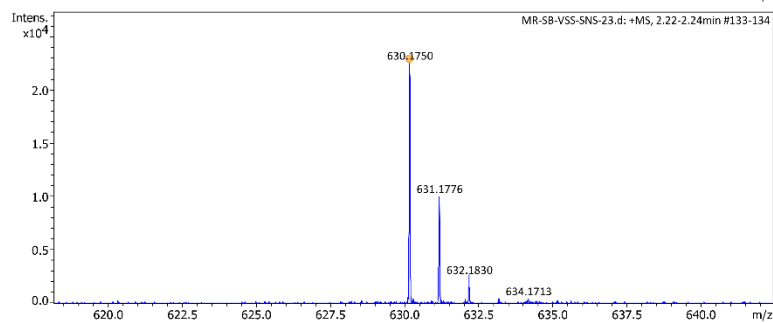

| Meas. m/z | # | Ion Formula | m/z      | err [ppm] | mSigma | # mSigma | Score  | rdB  | e <sup>-</sup> Conf | N-Rule |
|-----------|---|-------------|----------|-----------|--------|----------|--------|------|---------------------|--------|
| 630.1750  | 1 | C38H24N5O5  | 630.1772 | 3.5       | 6.4    | 1        | 100.00 | 30.0 | even                | ok     |

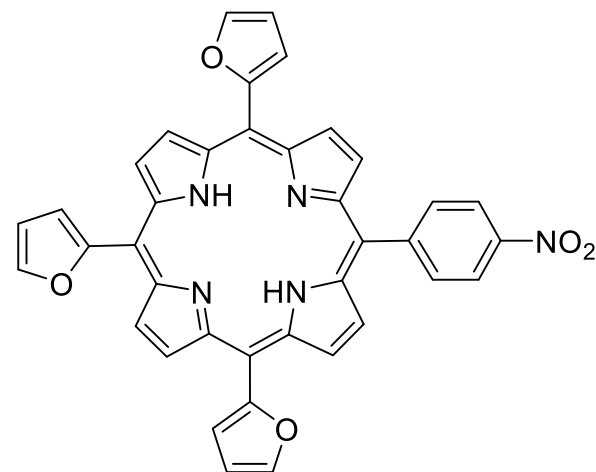Chemical Formula: C<sub>38</sub>H<sub>23</sub>N<sub>5</sub>O<sub>5</sub>Expected Mol. Wt.= 630.1772 [M+H]<sup>+</sup>Observed Mol. Wt.= 630.1750 [M+H]<sup>+</sup>

MR-SB-VSS-SNS-23.d

Bruker Compass DataAnalysis 5.1

printed: 4/15/2024 11:55:39 AM

by: iitb

Page 1 of 1

Figure S3. ES MS spectrum of 1

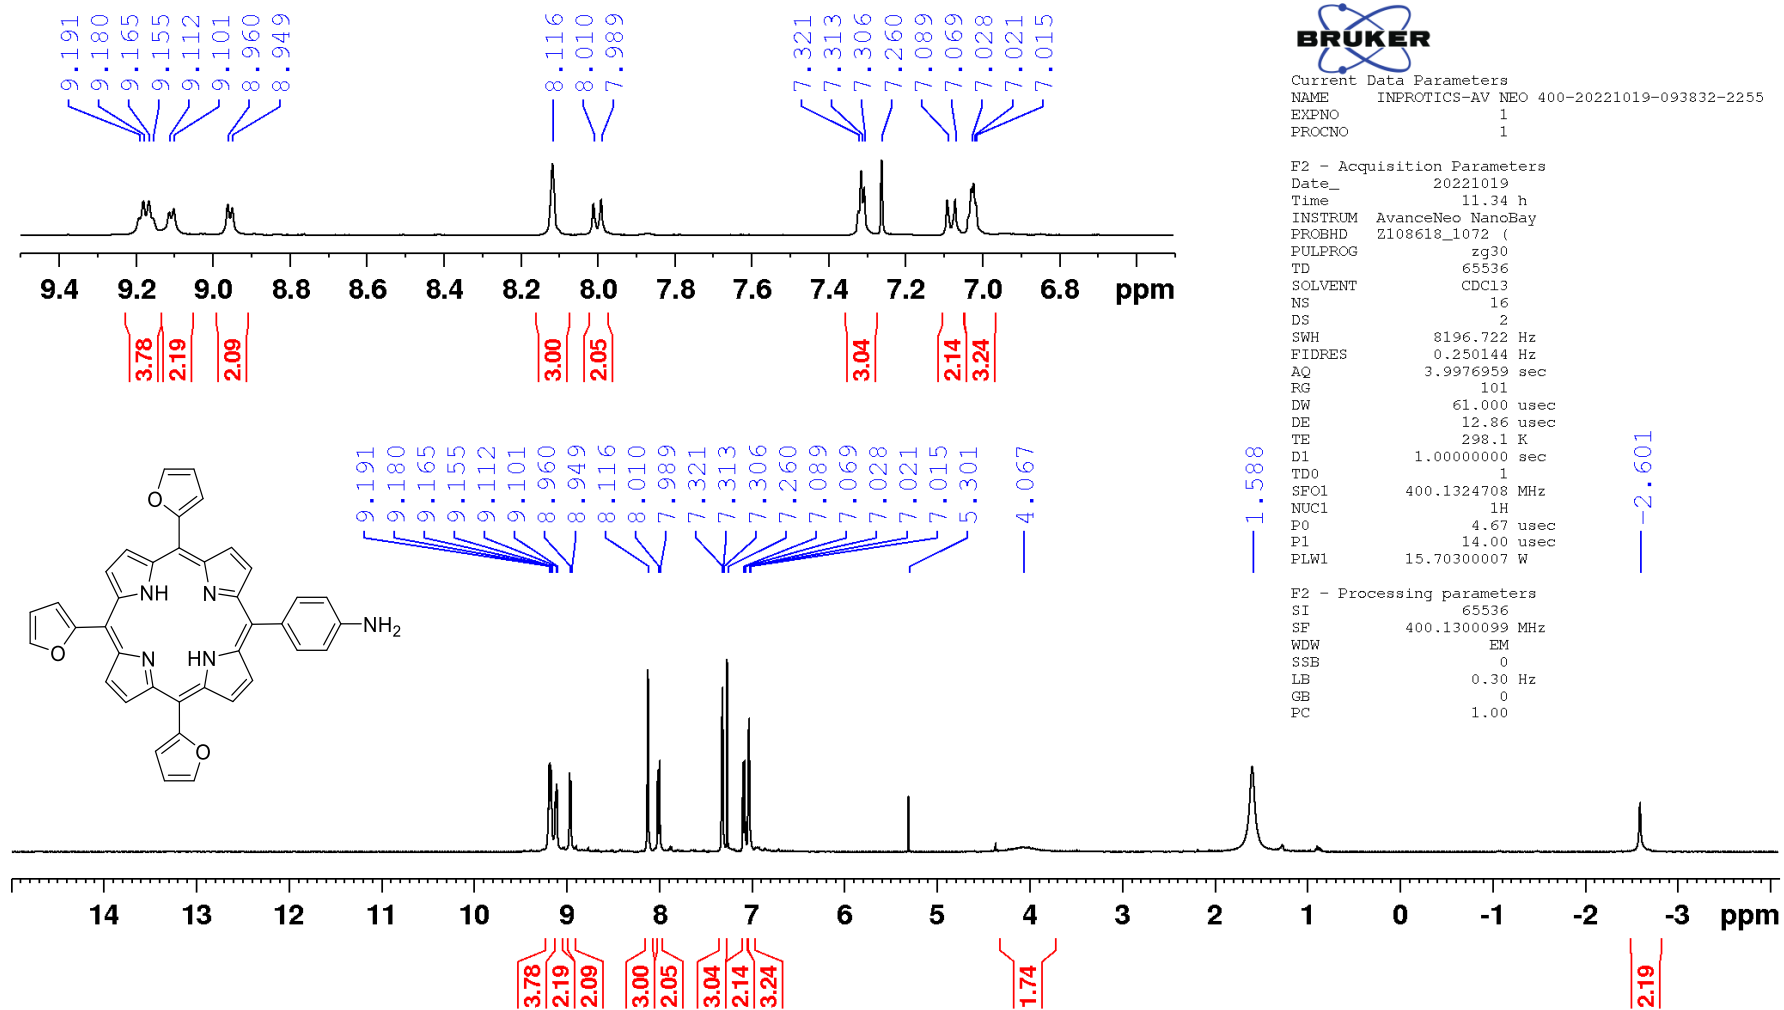

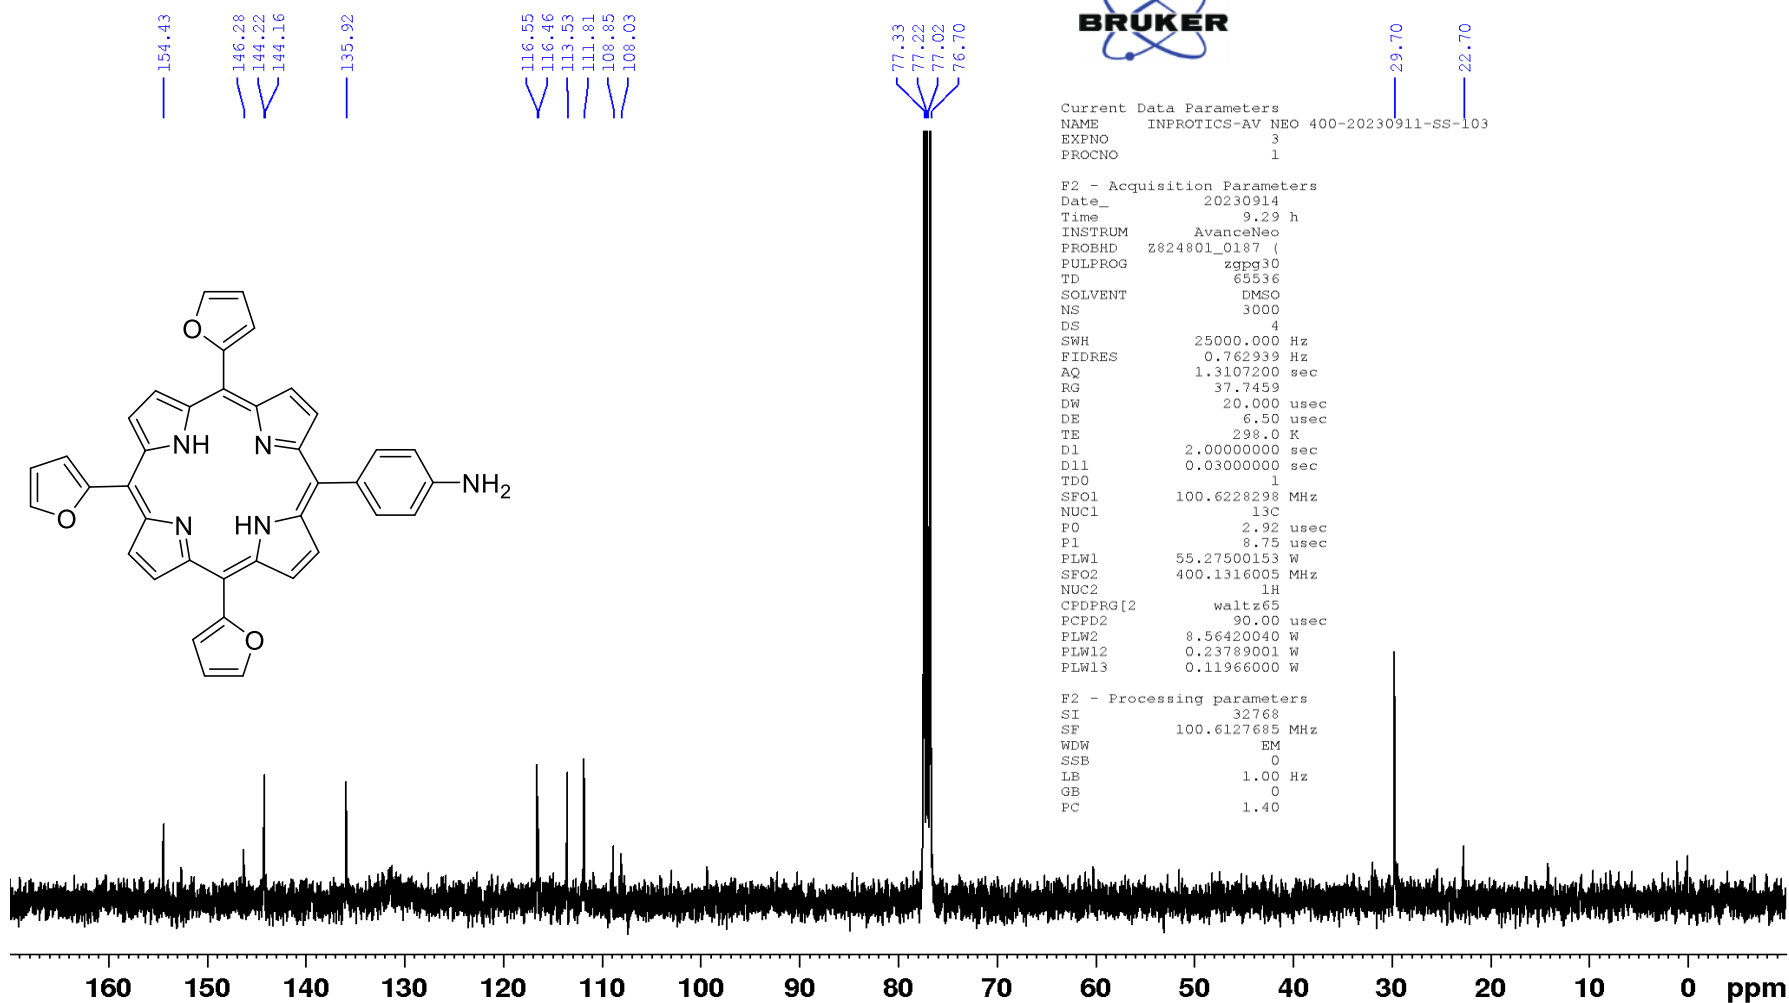

Figure S5.  $^{13}\text{C}$  NMR spectrum of **3**

DEPARTMENT OF CHEMISTRY, I.I.T.(B)

Analysis Info

Analysis Name D:\Data\APR-24\MR-SB-VSS-SNS-24a.d  
 Method Naformat\_pos\_1000.m  
 Sample Name MR-SB-VSS-SNS-24a  
 Comment C38H25N5O3

Acquisition Date 4/15/2024 12:07:18 PM

Operator iitb  
 Instrument maXis impact 282001.00081

Acquisition Parameter

|             |            |                      |          |                  |           |
|-------------|------------|----------------------|----------|------------------|-----------|
| Source Type | ESI        | Ion Polarity         | Positive | Set Nebulizer    | 0.3 Bar   |
| Focus       | Not active | Set Capillary        | 3700 V   | Set Dry Heater   | 180 °C    |
| Scan Begin  | 50 m/z     | Set End Plate Offset | -500 V   | Set Dry Gas      | 4.0 l/min |
| Scan End    | 1000 m/z   | Set Charging Voltage | 2000 V   | Set Divert Valve | Source    |
|             |            | Set Corona           | 0 nA     | Set APCI Heater  | 0 °C      |

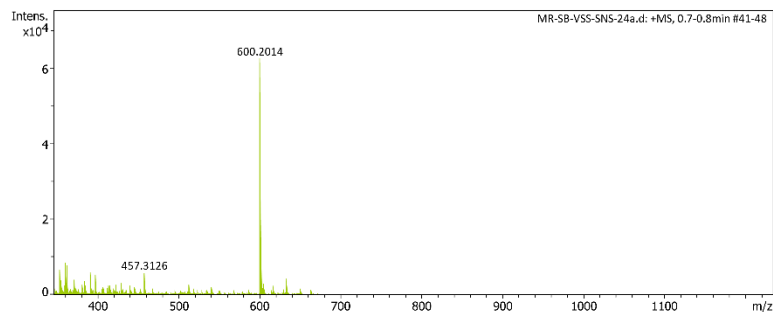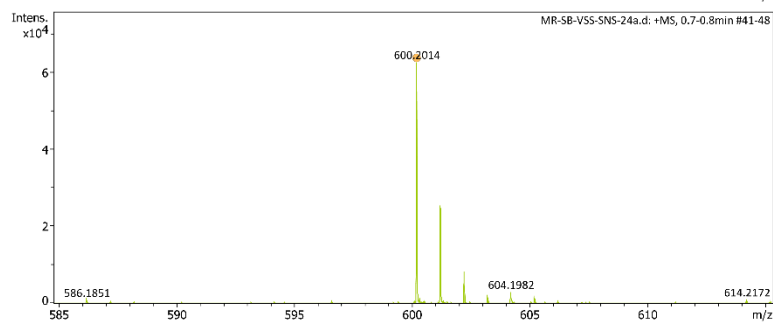

| Meas. m/z | # | Ion Formula | m/z      | err [ppm] | mSigma | # mSigma | Score  | rdB  | e <sup>-</sup> Conf | N-Rule |
|-----------|---|-------------|----------|-----------|--------|----------|--------|------|---------------------|--------|
| 600.2014  | 1 | C38H26N5O3  | 600.2030 | 2.7       | 24.8   | 1        | 100.00 | 29.0 | even                | ok     |

MR-SB-VSS-SNS-24a.d

Bruker Compass DataAnalysis 5.1

printed: 4/15/2024 12:10:08 PM

by: iitb

Page 1 of 1

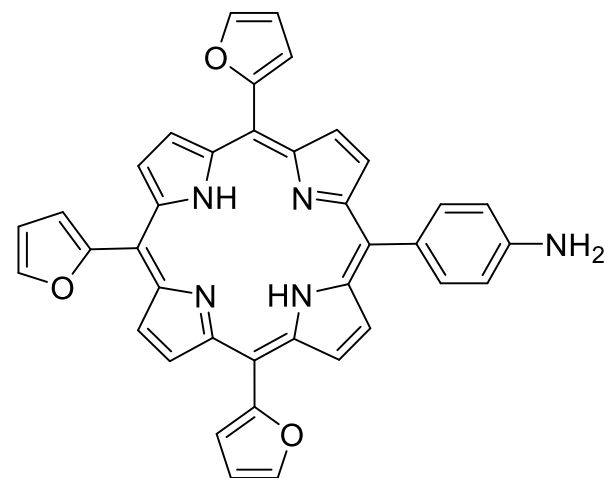

Chemical Formula: C<sub>38</sub>H<sub>25</sub>N<sub>5</sub>O<sub>3</sub>  
 Expected Mol. Wt. = 600.2030 [M+H]<sup>+</sup>  
 Observed Mol. Wt. = 600.2014 [M+H]<sup>+</sup>

Figure S6. ES MS spectrum of 3



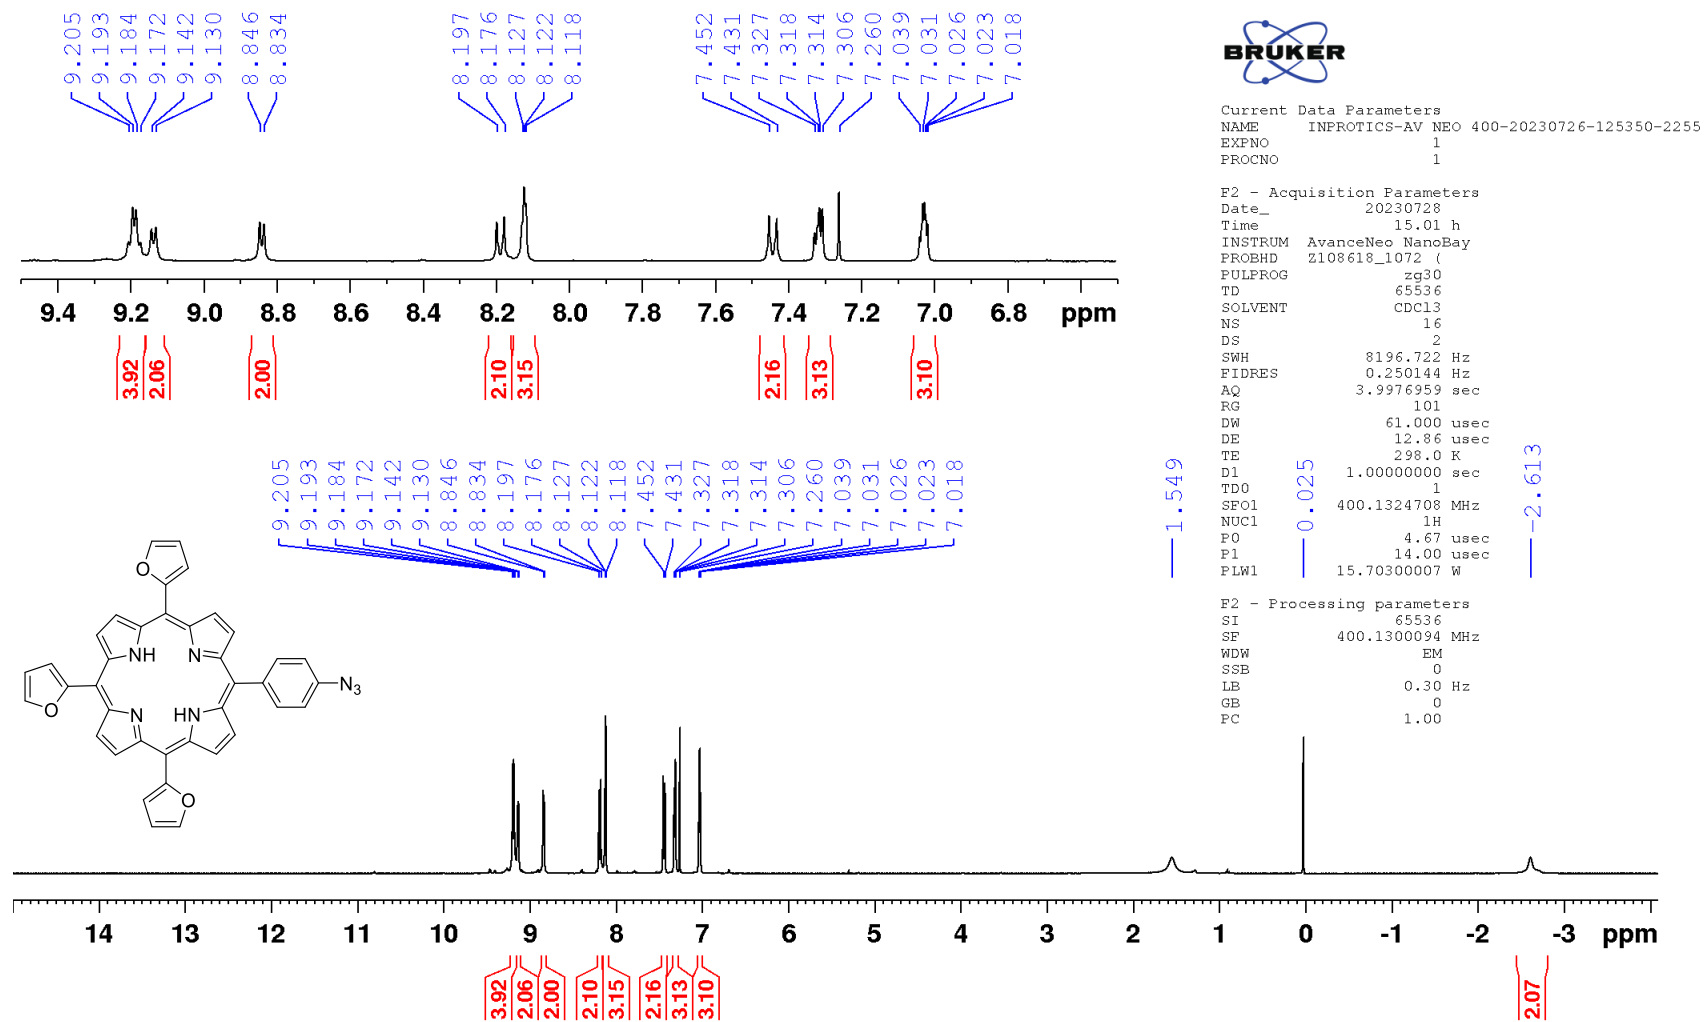

Figure S7. <sup>1</sup>H NMR spectrum of **5**

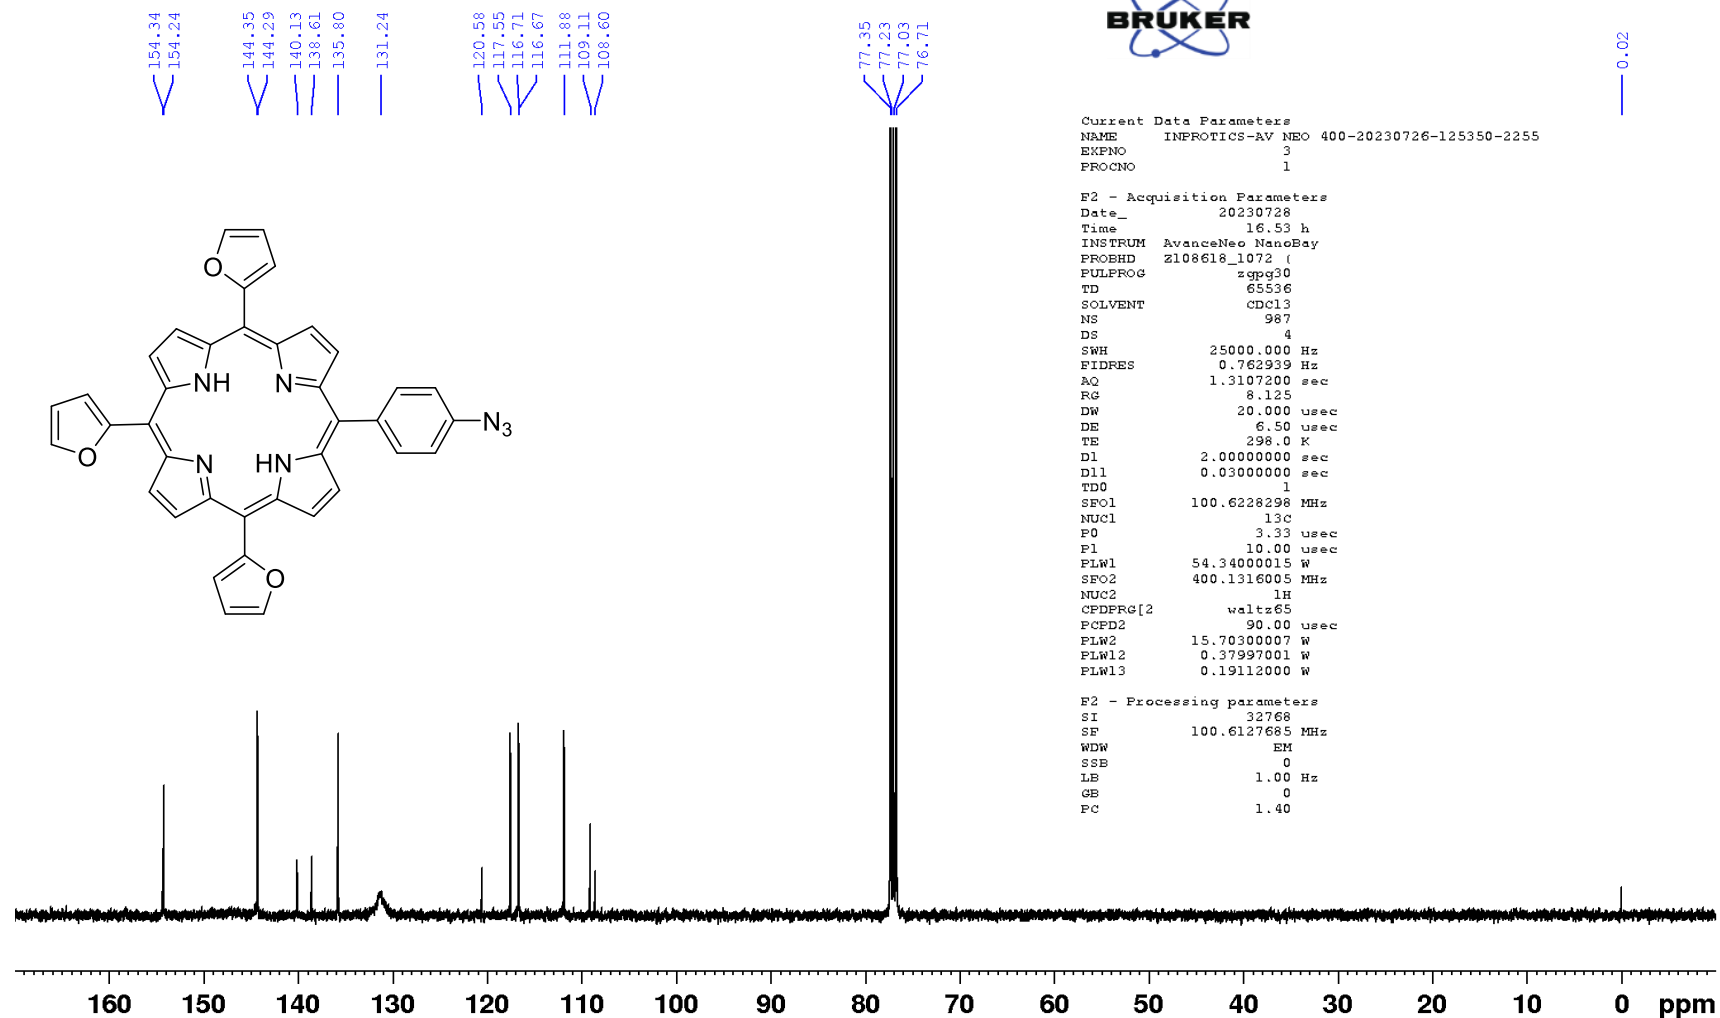

Figure S8. <sup>13</sup>C NMR spectrum of **5**

DEPARTMENT OF CHEMISTRY, I.I.T.(B)

**Analysis Info**  
 Analysis Name D:\Data\APR-24\MR-SB-VSS-SNS-25.d Acquisition Date 4/11/2024 4:33:14 PM  
 Method Naformat\_pos\_1000a.m Operator iitb  
 Sample Name MR-SB-VSS-SNS-25 Instrument maXis impact 282001.00081  
 Comment C38H23N7O3

**Acquisition Parameter**

|             |            |                      |          |                  |           |
|-------------|------------|----------------------|----------|------------------|-----------|
| Source Type | ESI        | Ion Polarity         | Positive | Set Nebulizer    | 0.3 Bar   |
| Focus       | Not active | Set Capillary        | 3700 V   | Set Dry Heater   | 180 °C    |
| Scan Begin  | 50 m/z     | Set End Plate Offset | -500 V   | Set Dry Gas      | 4.0 l/min |
| Scan End    | 1000 m/z   | Set Charging Voltage | 2000 V   | Set Divert Valve | Source    |
|             |            | Set Corona           | 0 nA     | Set APCI Heater  | 0 °C      |

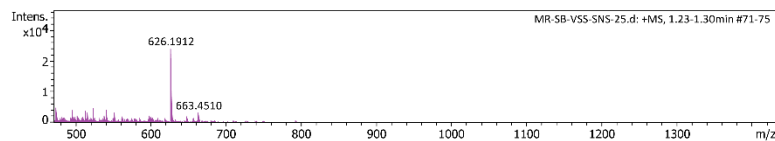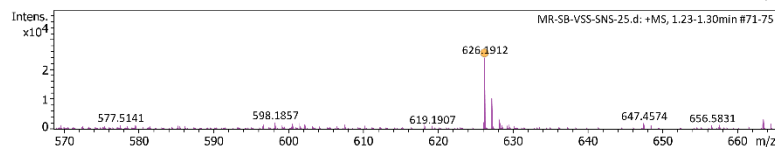

| Meas. m/z | # | Ion Formula | m/z      | err [ppm] | mSigma | # mSigma | Score  | rdB  | e <sup>-</sup> Conf | N-Rule |
|-----------|---|-------------|----------|-----------|--------|----------|--------|------|---------------------|--------|
| 626.1912  | 1 | C38H24N7O3  | 626.1935 | 3.7       | 17.6   | 1        | 100.00 | 31.0 | even                | ok     |

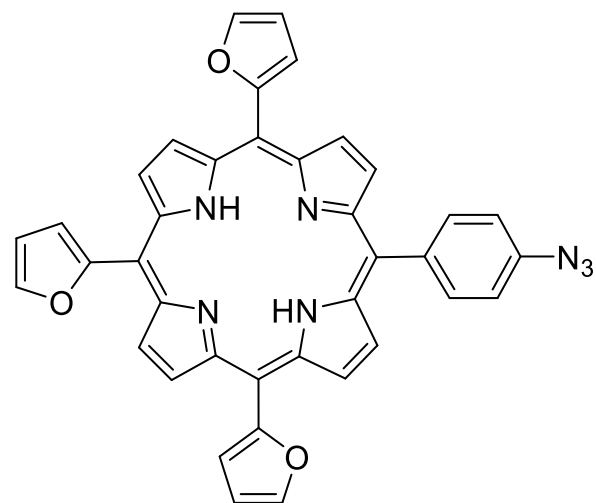

Chemical Formula: C<sub>38</sub>H<sub>23</sub>N<sub>7</sub>O<sub>3</sub>

Expected Mol. Wt.= 626.1935 [M+H]<sup>+</sup>

Observed Mol. Wt.= 626.1912 [M+H]<sup>+</sup>

**Figure S9.** ES MS spectrum of **5**

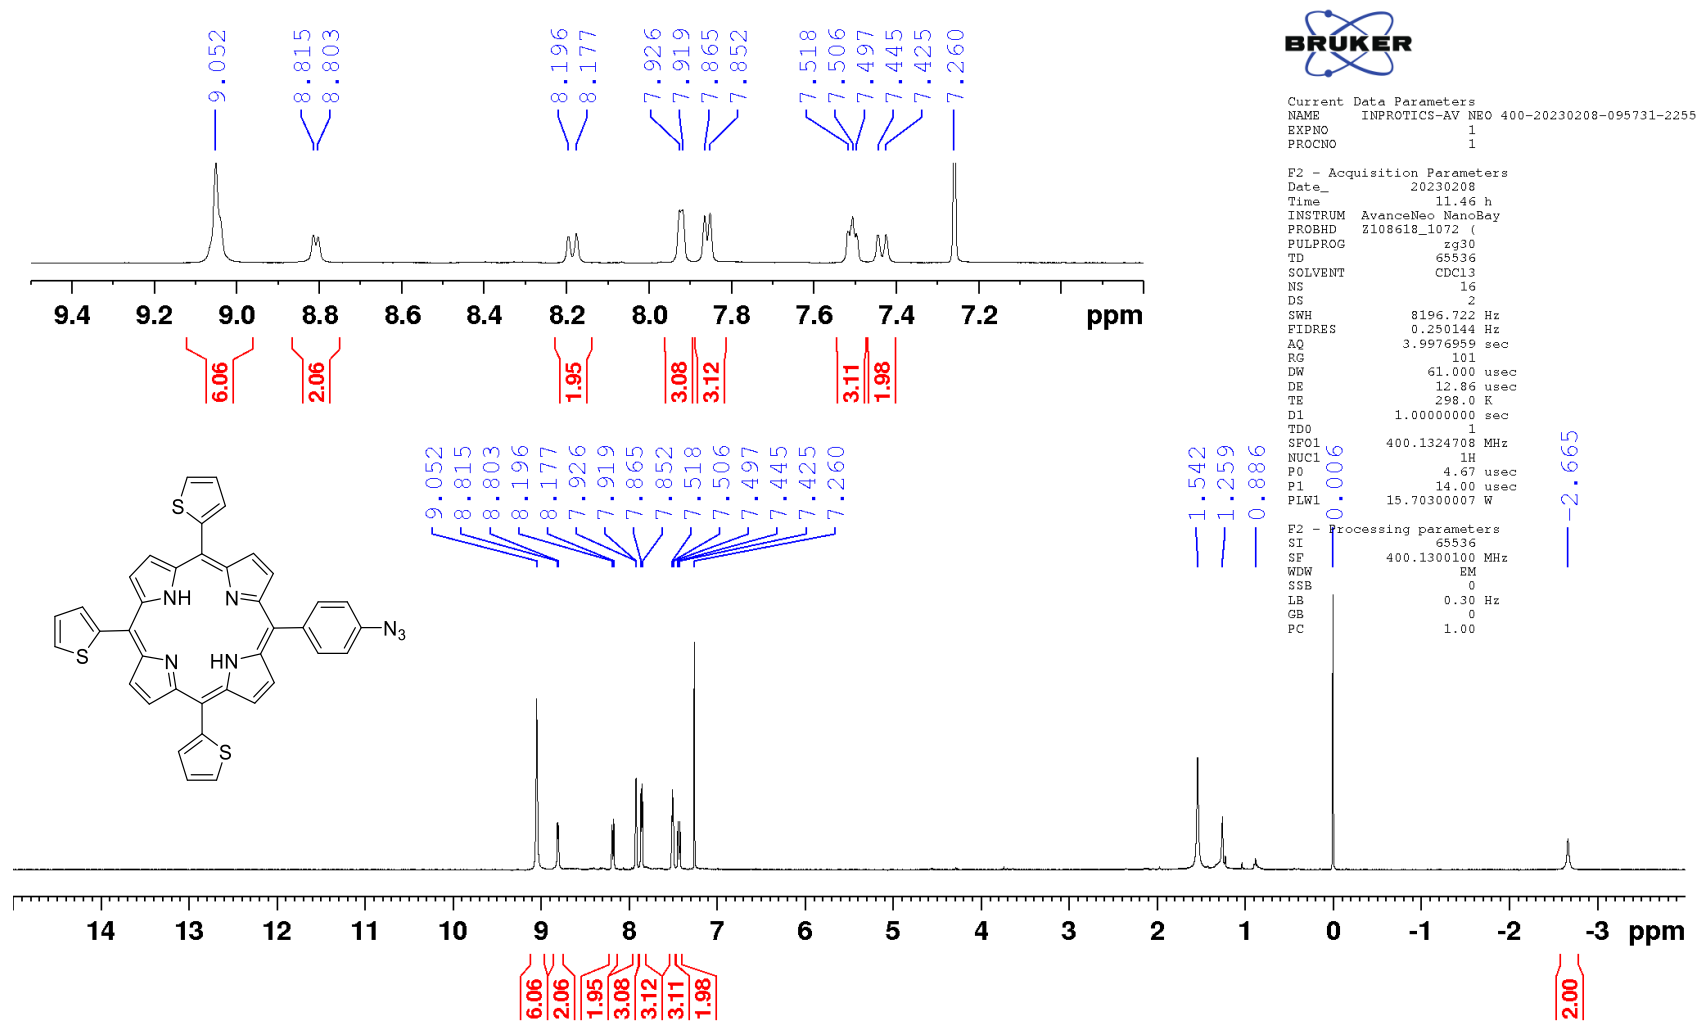

**Figure S10.**  $^1\text{H}$  NMR spectrum of **6**

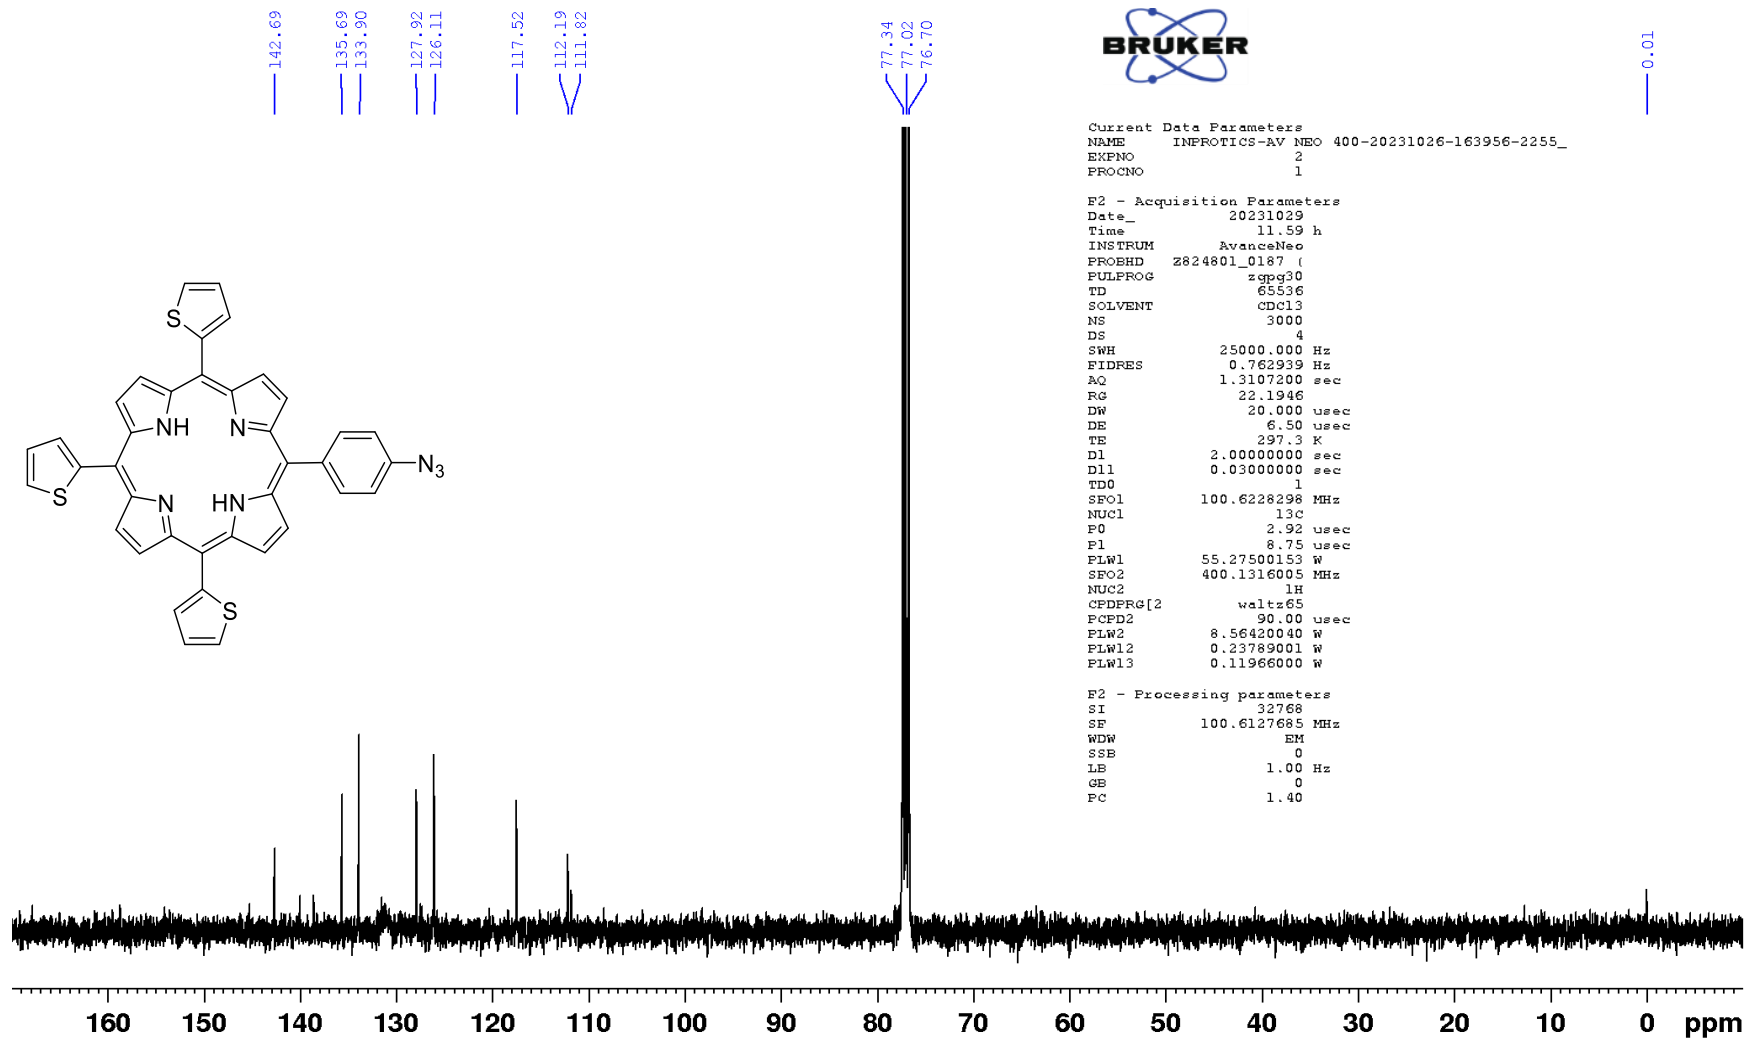

Figure S11.  $^{13}\text{C}$  NMR spectrum of **6**

## Sample Information

|                |                 |                    |                                                                 |
|----------------|-----------------|--------------------|-----------------------------------------------------------------|
| Name           | MR-SB-SHS-21    | Data File Path     | X:\Projects\MASS Data\Data\APRIL-2024\MR-SB-SHS-21.d            |
| Sample ID      |                 | Acq. Time (Local)  | 4/16/2024 4:54:08 PM (UTC+05:30)                                |
| Instrument     | LCMSQTOF-G6548B | Method Path (Acq)  | D:\Projects\MASS Data\Methods\A1BL_POS_100-1000_4000_500_120.um |
| MS Type        | QTOF            | Version (Acq SW)   | 6200 series TOF/6500 series Q TOF (11.0.203.0)                  |
| Inj. Vol. (ul) | 0.3             | IRM Status         | Success                                                         |
| Position       | P2-A1           | Method Path (DA)   | D:\MassHunter\Report Templates\REPORT_METHOD\HRMS_1.um          |
| Plate Pos.     |                 | Target Source Path |                                                                 |
| Operator       | SYSTEM (SYSTEM) | Result Summary     | 1 qualified (1 targets)                                         |

## Sample Spectra

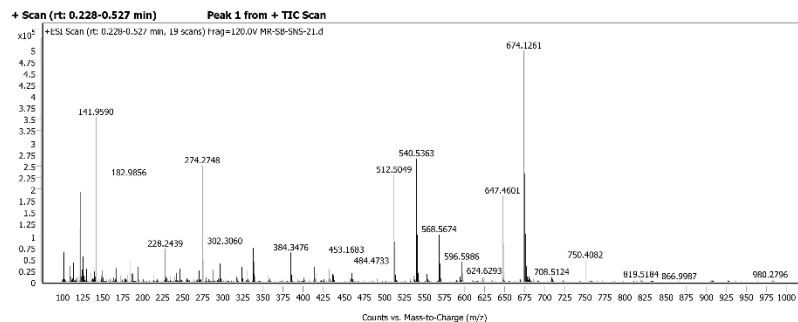

## Compound Details

Cpd. 1: C38 H23 N7 S3

| Formula       | m/z      | Observed M/Z     | Difference Da    | Difference PPM   | Score |
|---------------|----------|------------------|------------------|------------------|-------|
| C38 H23 N7 S3 | 674.1262 | 674.126210800641 | 1.19870820662982 | 1.78083000341317 | 97.34 |

## Compound Spectra (Zoomed)

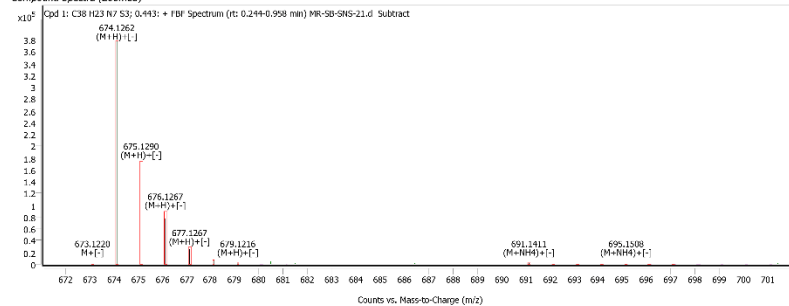
 MassHunter Qual 10.0  
 (End of Report)
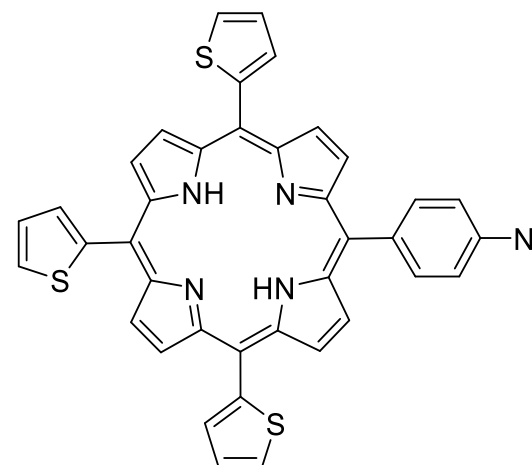Chemical Formula: C<sub>38</sub>H<sub>23</sub>N<sub>7</sub>S<sub>3</sub>Expected Mol. Wt. = 674.1262 [M+H]<sup>+</sup>Observed Mol. Wt. = 674.1262 [M+H]<sup>+</sup>

Figure S12. LCMS QTOF spectrum of 6

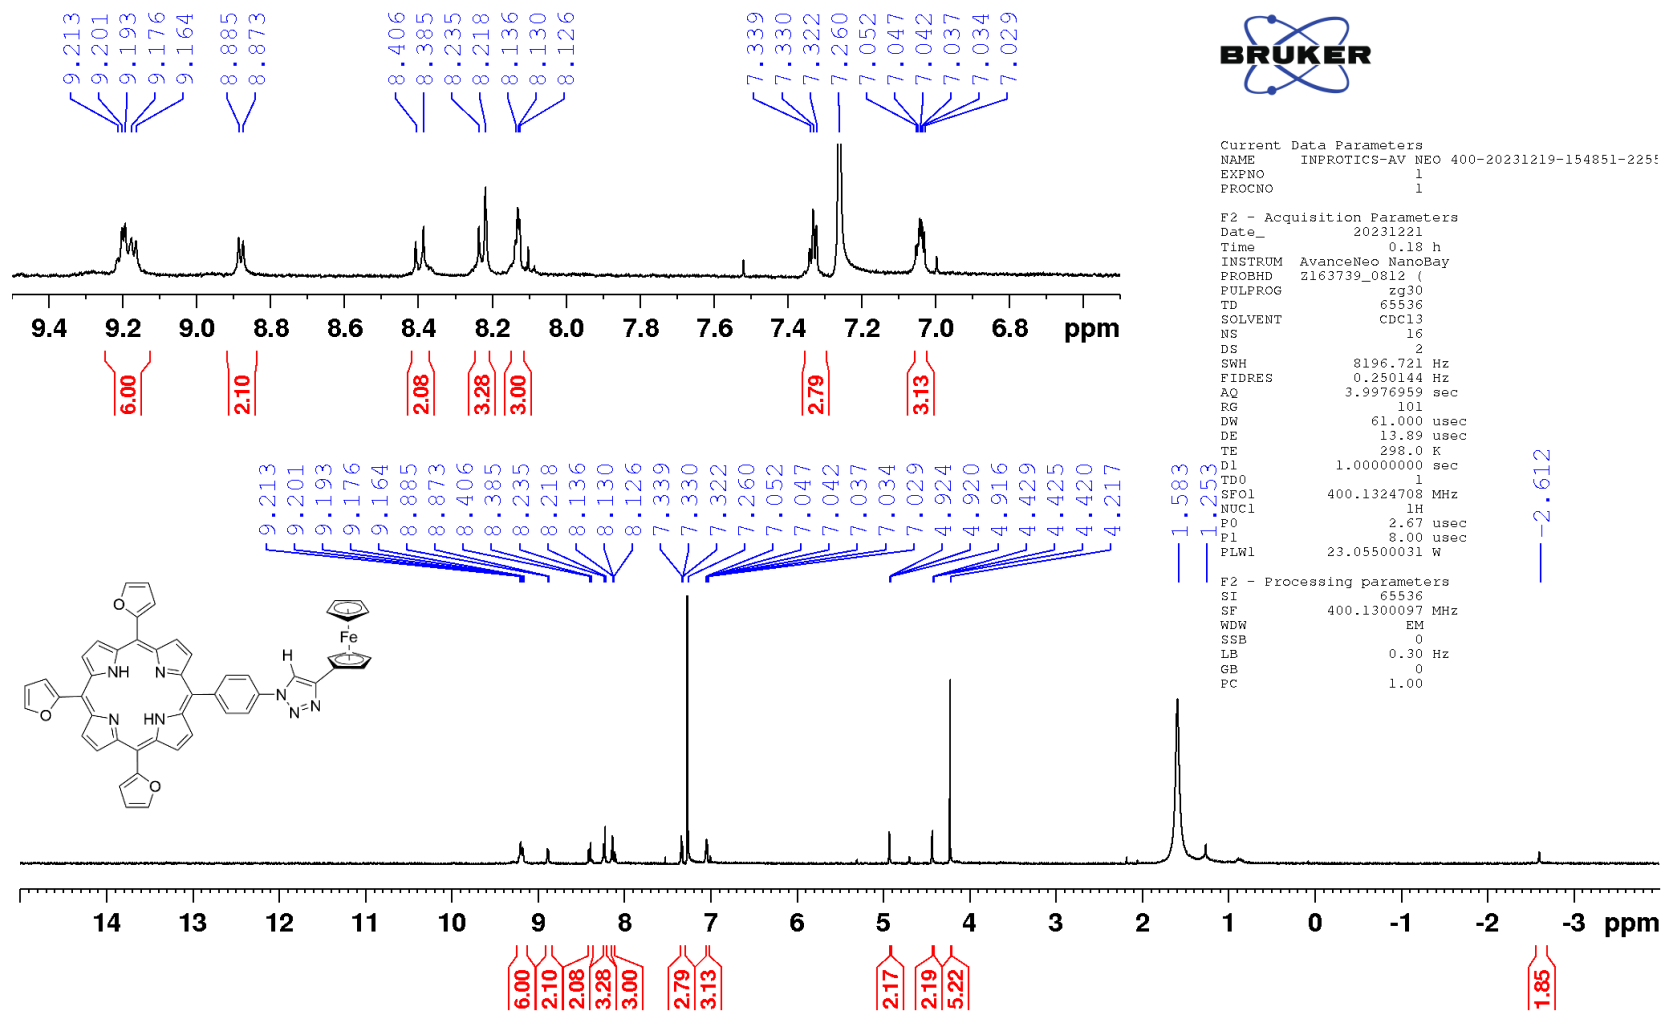

Figure S13. <sup>1</sup>H NMR spectrum of **8**

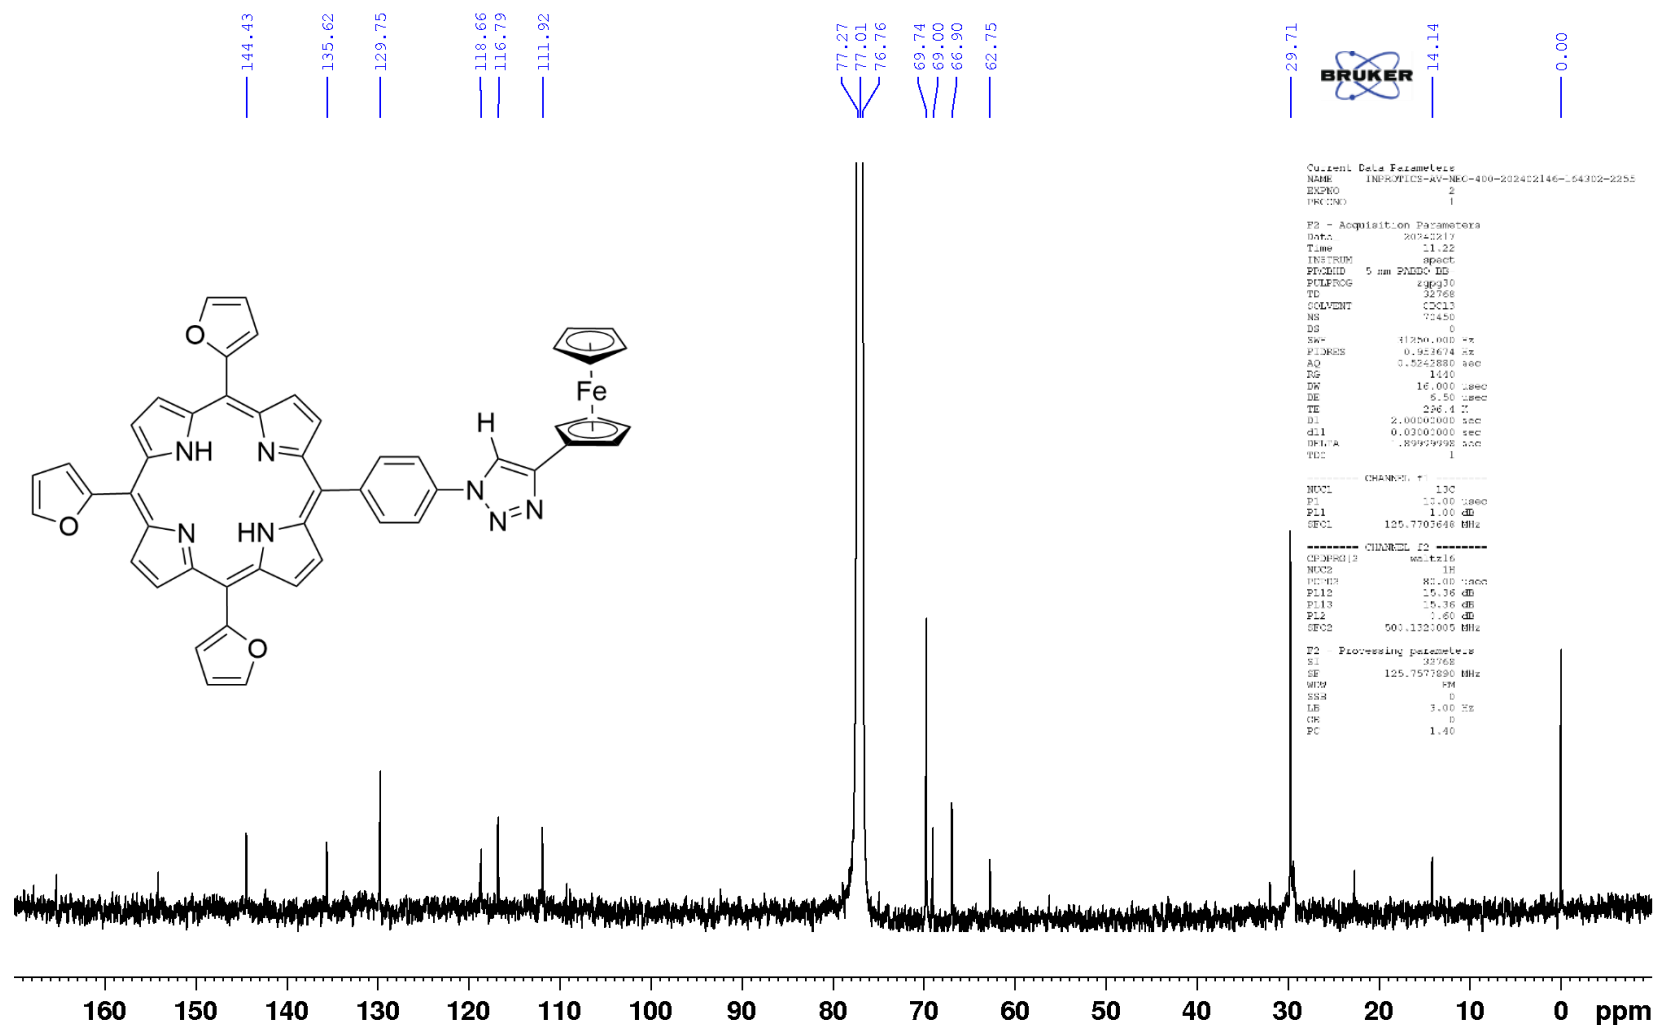

Figure S14.  $^{13}\text{C}$  NMR spectrum of **8**



## Sample Information

|                |                 |                    |                                                                                              |
|----------------|-----------------|--------------------|----------------------------------------------------------------------------------------------|
| Name           | MR-SB-VSS-SNS-7 | Data File Path     | D:\MassHunter\Data\NOV-23\MR-SB-VSS-SNS-7.d                                                  |
| Sample ID      |                 | Acq. Time (Local)  | 06-11-2023 4:14:46 PM (UTC-05:30)                                                            |
| Instrument     | LCMS QTOF       | Method Path (Acq)  | D:\MassHunter\Methods\6545KT_checkou\Methods\TRAINING\MS_SCAN_AB_POS_100-1000_4000-100-120.m |
| MS Type        | QTOF            | Version (Acq SW)   | 6300 series TOF/6500 series Q-TOF B.09.00 (B9044.0)                                          |
| Inj. Vol. (ul) | 0.5             | IRM Status         | Success                                                                                      |
| Position       | P1-E2           | Method Path (DA)   | D:\MassHunter\Report Templates\REPORT_METHOD\HRMS_1.m                                        |
| Plate Pos.     |                 | Target Source Path |                                                                                              |
| Operator       |                 | Result Summary     | 1 qualified (1 targets)                                                                      |

## Sample Spectra

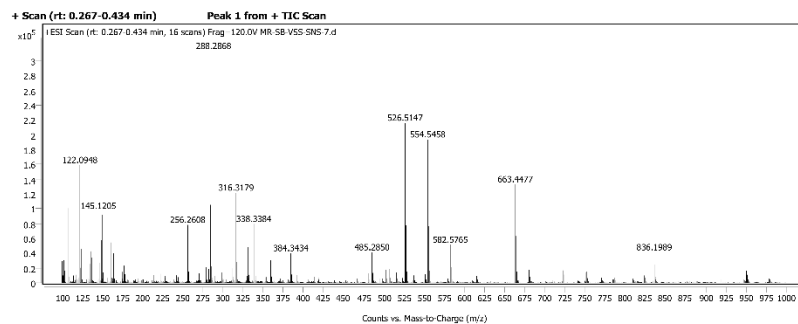

## Compound Details

Cpd. 1: C<sub>50</sub>H<sub>33</sub>FeN<sub>7</sub>O<sub>3</sub>

| Formula                                                         | m/z      | Observed M/Z     | Difference Da     | Difference PPM    | Score |
|-----------------------------------------------------------------|----------|------------------|-------------------|-------------------|-------|
| C <sub>50</sub> H <sub>33</sub> FeN <sub>7</sub> O <sub>3</sub> | 836.1990 | 836.198950831405 | -7.81630989069981 | -9.38102664837984 | 62.42 |

## Compound Spectra (Zoomed)

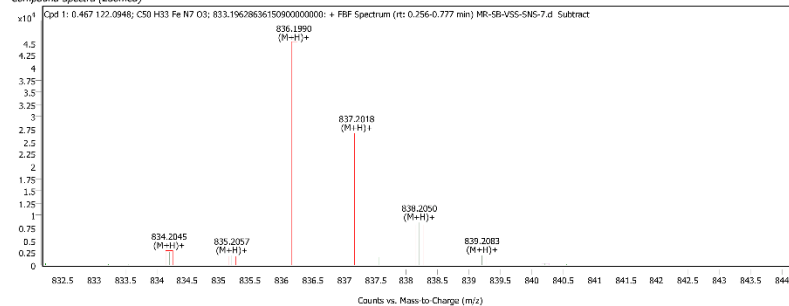
 MassHunter Qual 10.0  
 (End of Report)
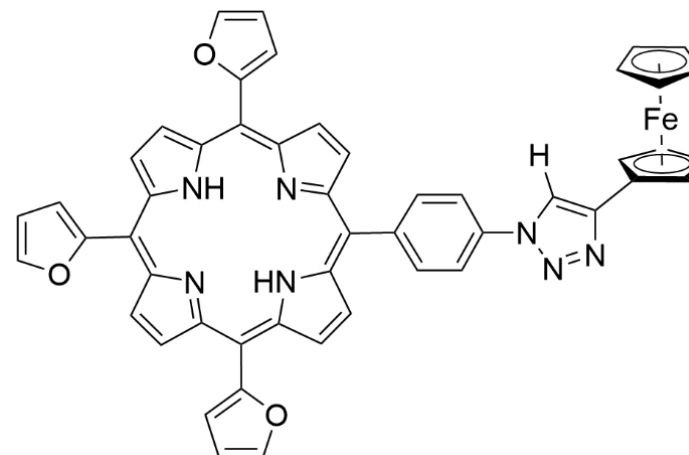Chemical Formula: C<sub>50</sub>H<sub>33</sub>FeN<sub>7</sub>O<sub>3</sub>Expected Mol. Wt.= 836.1990 [M+H]<sup>+</sup>Observed Mol. Wt.= 836.1989 [M+H]<sup>+</sup>

Figure S15. LCMS QTOF spectrum of

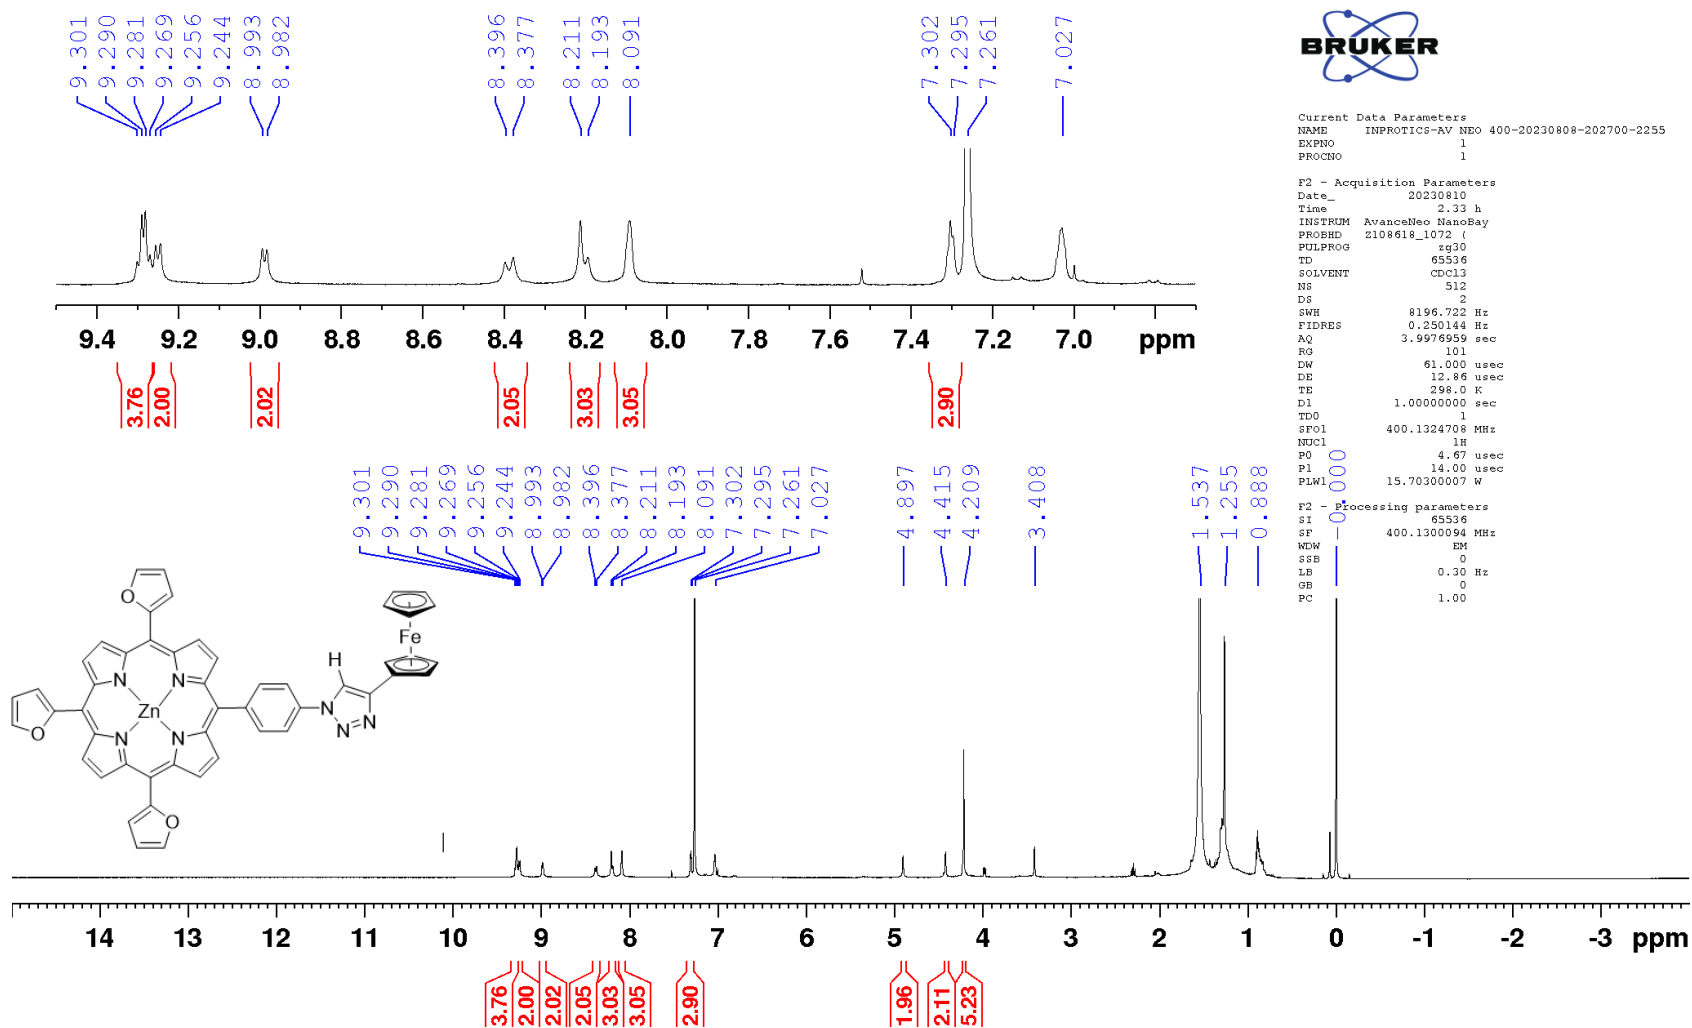

Figure S16. <sup>1</sup>H NMR spectrum of Zn-8

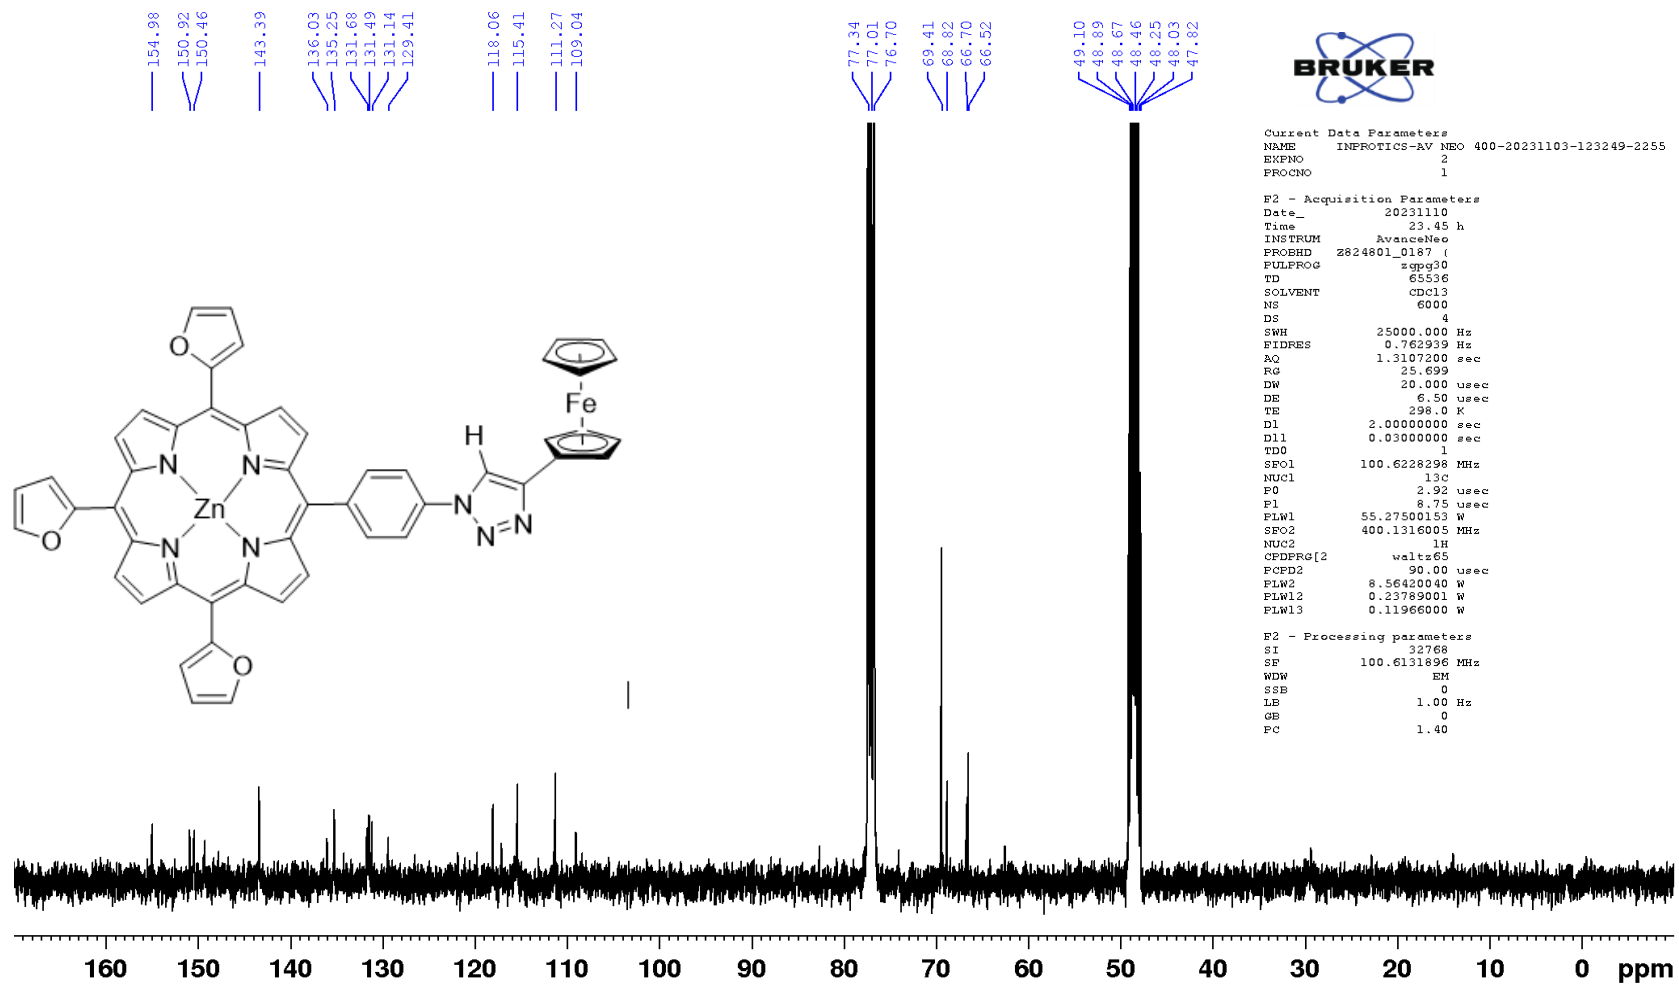

Figure S17. <sup>13</sup>C NMR spectrum of Zn-8

## Sample Information

|                |                 |                    |                                                                                               |
|----------------|-----------------|--------------------|-----------------------------------------------------------------------------------------------|
| Name           | MR-SB-VSS-SNS-8 | Data File Path     | D:\MassHunter\Data\NOV-23\MR-SB-VSS-SNS-8.d                                                   |
| Sample ID      |                 | Acq. Time (Local)  | 06-11-2023 3:27:58 PM (UTC-05:30)                                                             |
| Instrument     | LCMS QTOF       | Method Path (Acq)  | D:\MassHunter\Methods\6545XT_checkout\Methods\TRAINING\MS_SCAN_AB_POS_100-1000_4000-100-120.m |
| MS Type        | QTOF            | Version (Acq SW)   | 6200 series TOF/6500 series Q-TOF B.09.00 (B9044.0)                                           |
| Inj. Vol. (ul) | 0.5             | IRM Status         | Success                                                                                       |
| Position       | P1-D3           | Method Path (DA)   | D:\MassHunter\Report Templates\REPORT_METHOD\HRMS_1.m                                         |
| Plate Pos.     |                 | Target Source Path |                                                                                               |
| Operator       |                 | Result Summary     | 1 qualified (1 targets)                                                                       |

## Sample Spectra

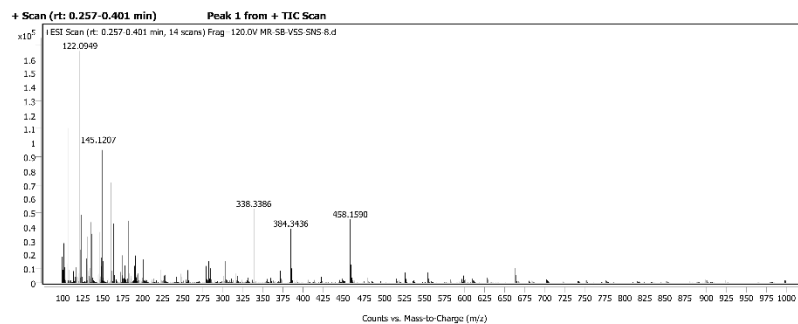

## Compound Details

Cpd. 1: C<sub>50</sub>H<sub>31</sub>Fe N<sub>7</sub>O<sub>3</sub>Zn

| Formula                                                             | m/z      | Observed M/Z    | Difference Da     | Difference PPM    | Score |
|---------------------------------------------------------------------|----------|-----------------|-------------------|-------------------|-------|
| C <sub>50</sub> H <sub>31</sub> Fe N <sub>7</sub> O <sub>3</sub> Zn | 898.1097 | 898.10975064633 | -10.7123317020523 | -11.9675132267751 | 22.63 |

## Compound Spectra (Zoomed)

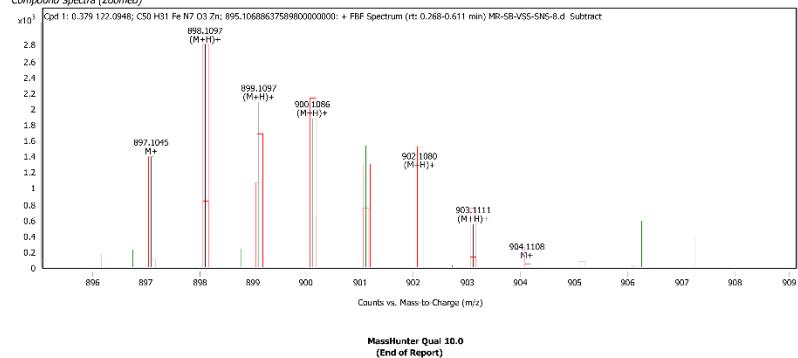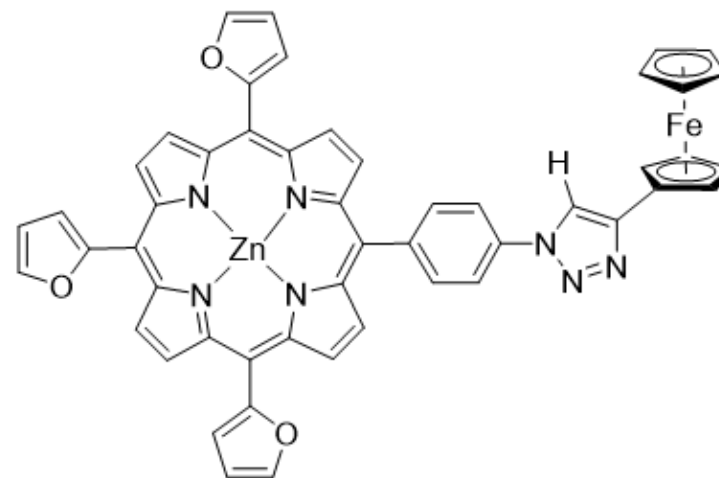Chemical Formula: C<sub>50</sub>H<sub>31</sub>FeN<sub>7</sub>O<sub>3</sub>ZnExpected Mol. Wt.= 898.1097 [M+H]<sup>+</sup>Observed Mol. Wt.= 898.1097 [M+H]<sup>+</sup>

Figure S18. LCMS QTOF spectrum of Zn-8

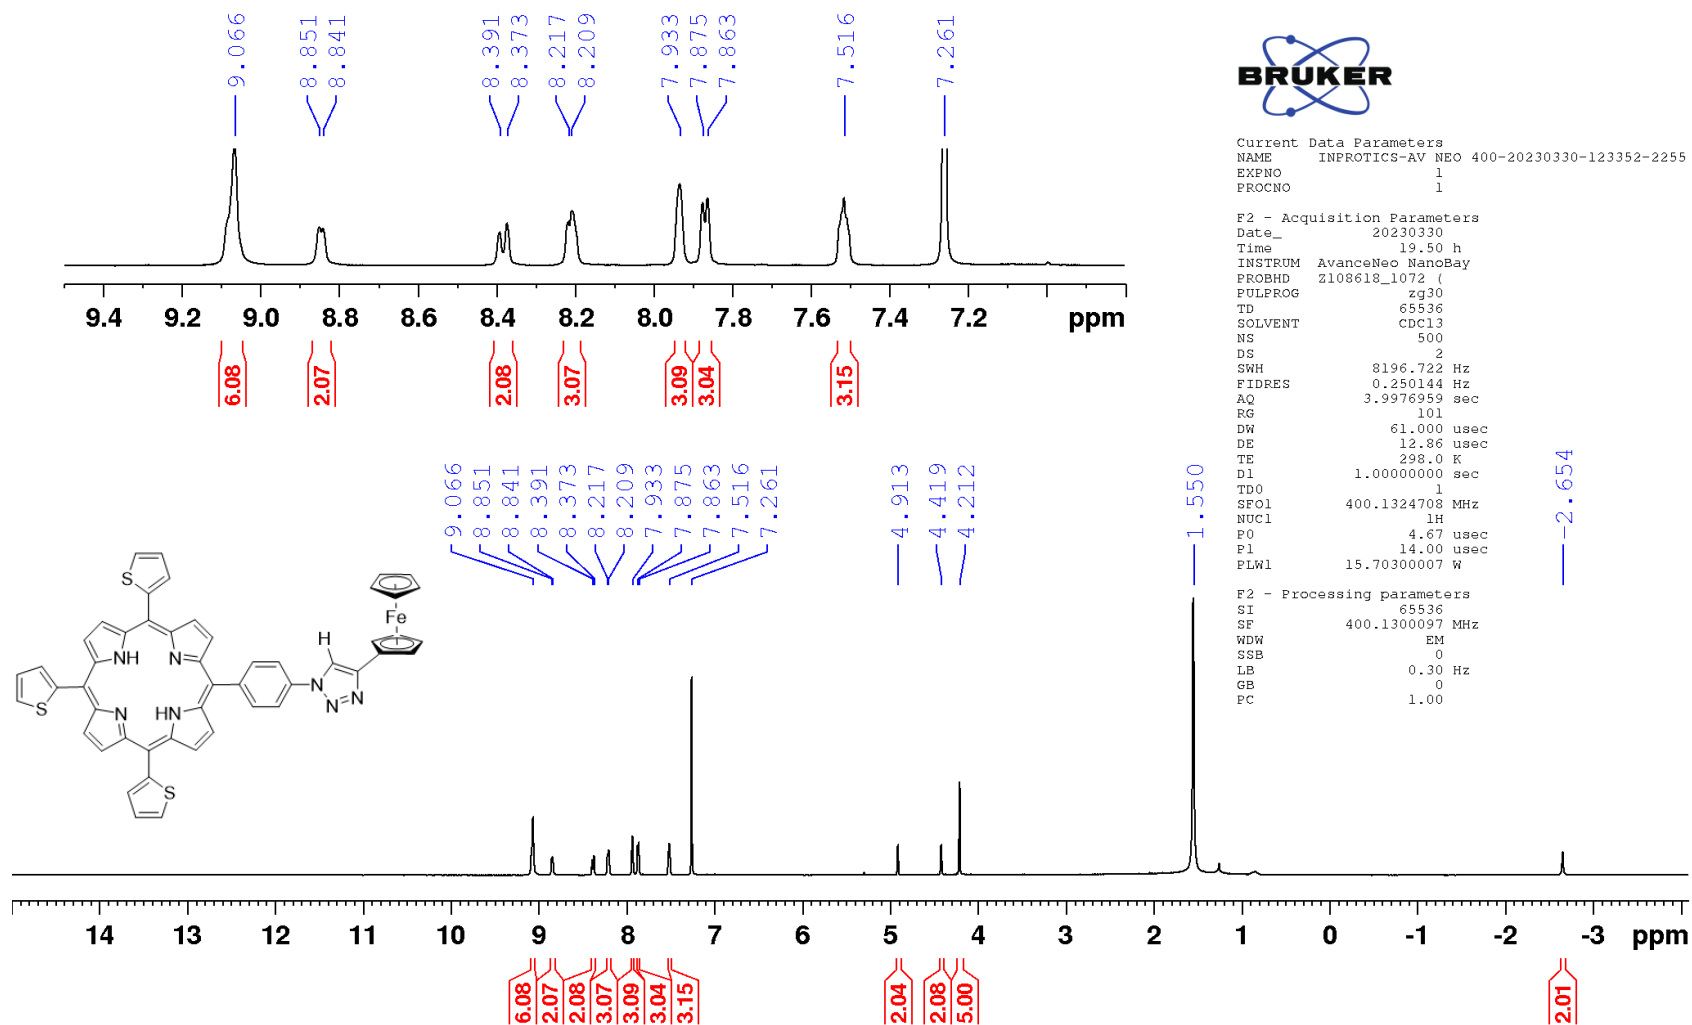

Figure S19. <sup>1</sup>H NMR spectrum of **9**

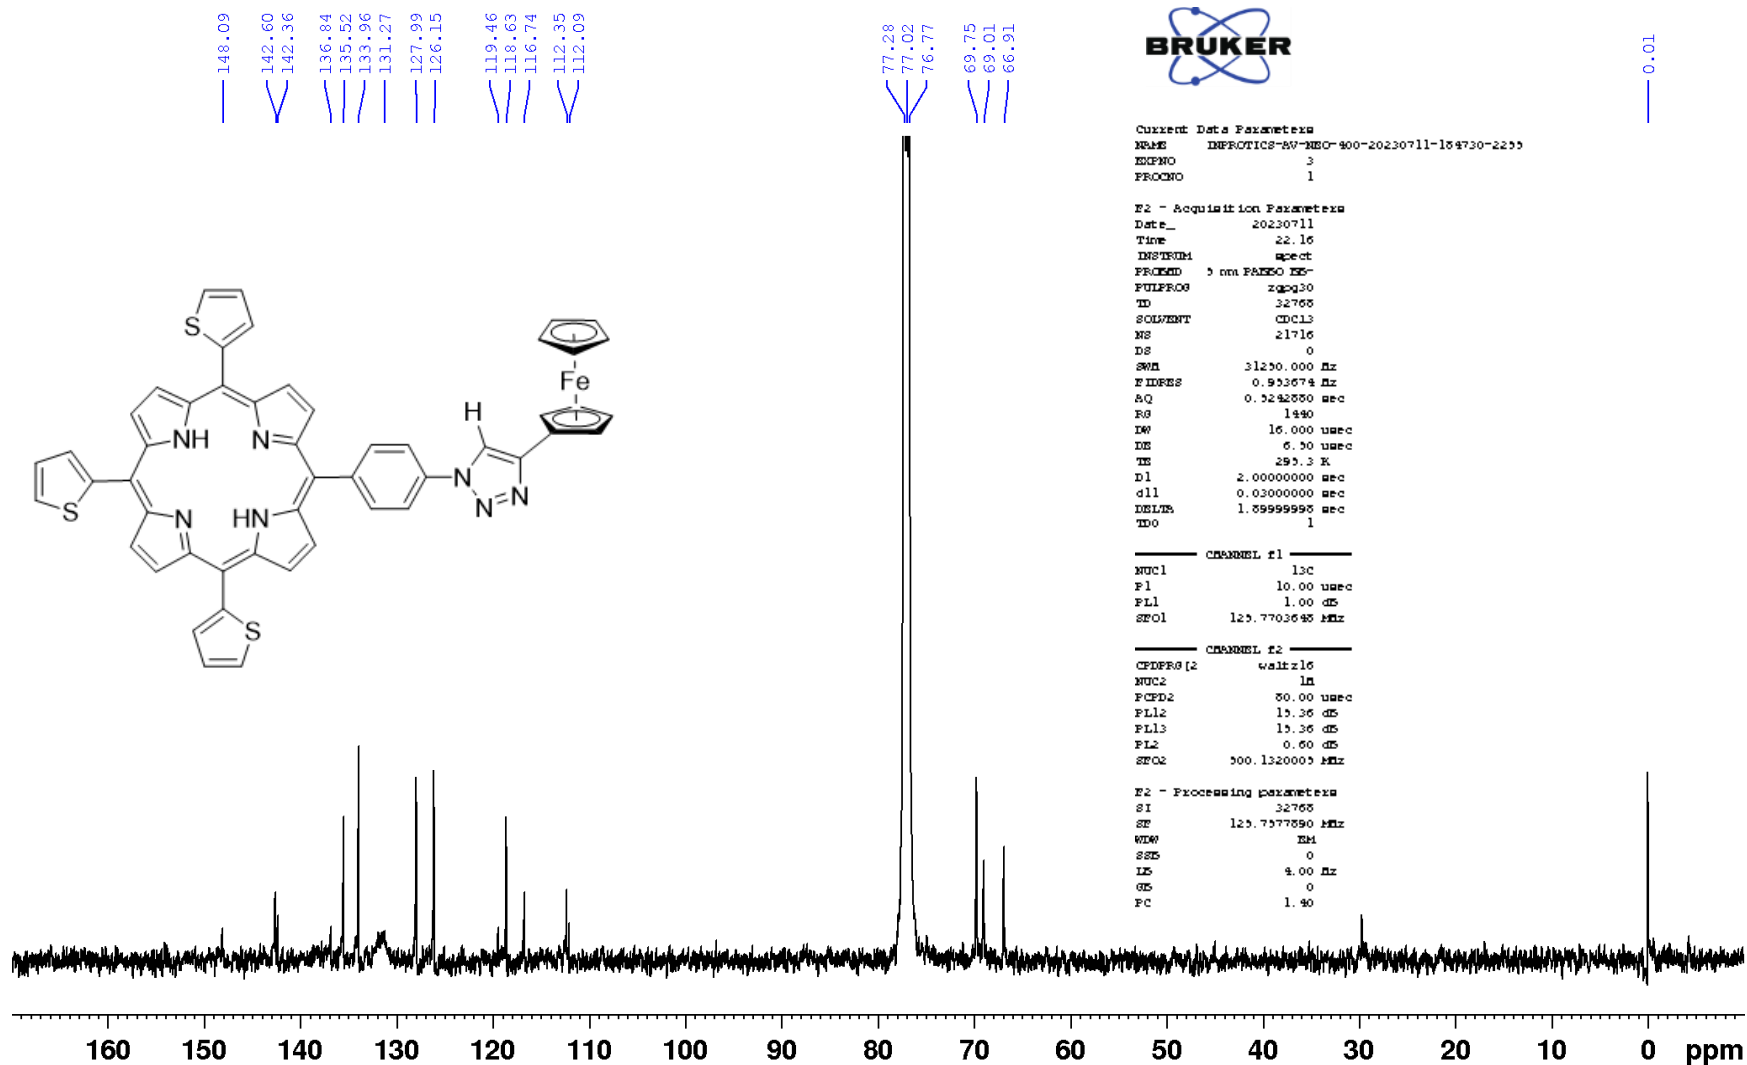

Figure S20.  $^{13}\text{C}$  NMR spectrum of **9**

DEPARTMENT OF CHEMISTRY, I.I.T.(B)

**Analysis Info**  
 Analysis Name: D:\Data\NOV-2023\MR-VSS-SNS-2.d  
 Acquisition Date: 11/9/2023 3:43:27 PM  
 Method: NaI-CsI\_pos\_1000-a.m  
 Operator: IITB  
 Sample Name: MR-VSS-SNS-2  
 Instrument: maXis impact 282001.00081  
 Comment: C50H33FeN7S3

**Acquisition Parameter**

|             |            |                      |          |                  |           |
|-------------|------------|----------------------|----------|------------------|-----------|
| Source Type | ESI        | Ion Polarity         | Positive | Set Nebulizer    | 0.3 Bar   |
| Focus       | Not active | Set Capillary        | 3700 V   | Set Dry Heater   | 180 °C    |
| Scan Begin  | 50 m/z     | Set End Plate Offset | -500 V   | Set Dry Gas      | 4.5 l/min |
| Scan End    | 1000 m/z   | Set Charging Voltage | 2000 V   | Set Divert Valve | Source    |
|             |            | Set Corona           | 0 nA     | Set APCI Heater  | 0 °C      |

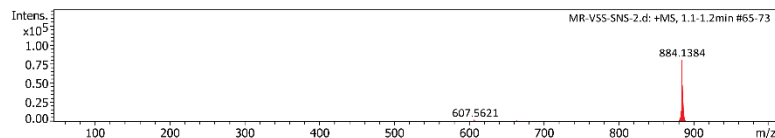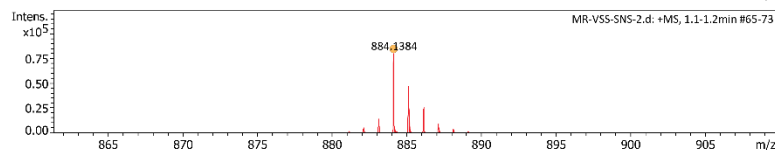

| Meas. m/z | # | Ion Formula  | m/z      | err [ppm] | mSigma | # mSigma | Score  | rdb  | e <sup>-</sup> Conf | N-Rule |
|-----------|---|--------------|----------|-----------|--------|----------|--------|------|---------------------|--------|
| 884.1384  | 1 | C50H34FeN7S3 | 884.1382 | -0.1      | 17.1   | 1        | 100.00 | 44.5 | odd                 | -      |

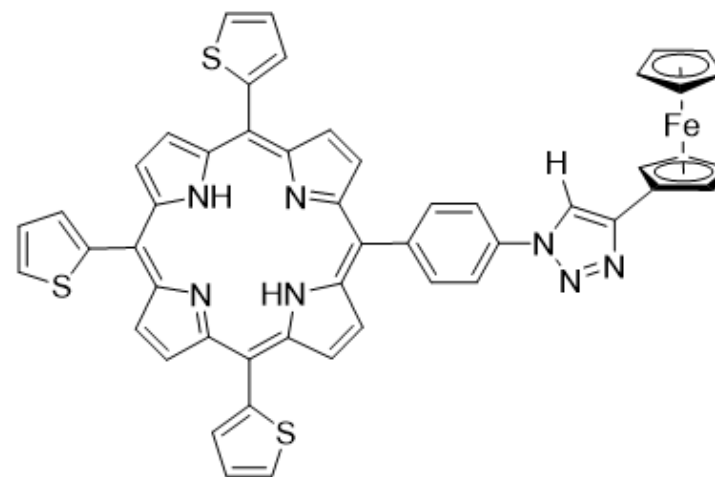

Chemical Formula: C<sub>50</sub>H<sub>33</sub>FeN<sub>7</sub>S<sub>3</sub>

Expected Mol. Wt.= 884.1382 [M+H]<sup>+</sup>

Observed Mol. Wt.= 884.1384 [M+H]<sup>+</sup>

**Figure S21.** ES MS spectrum of **9**

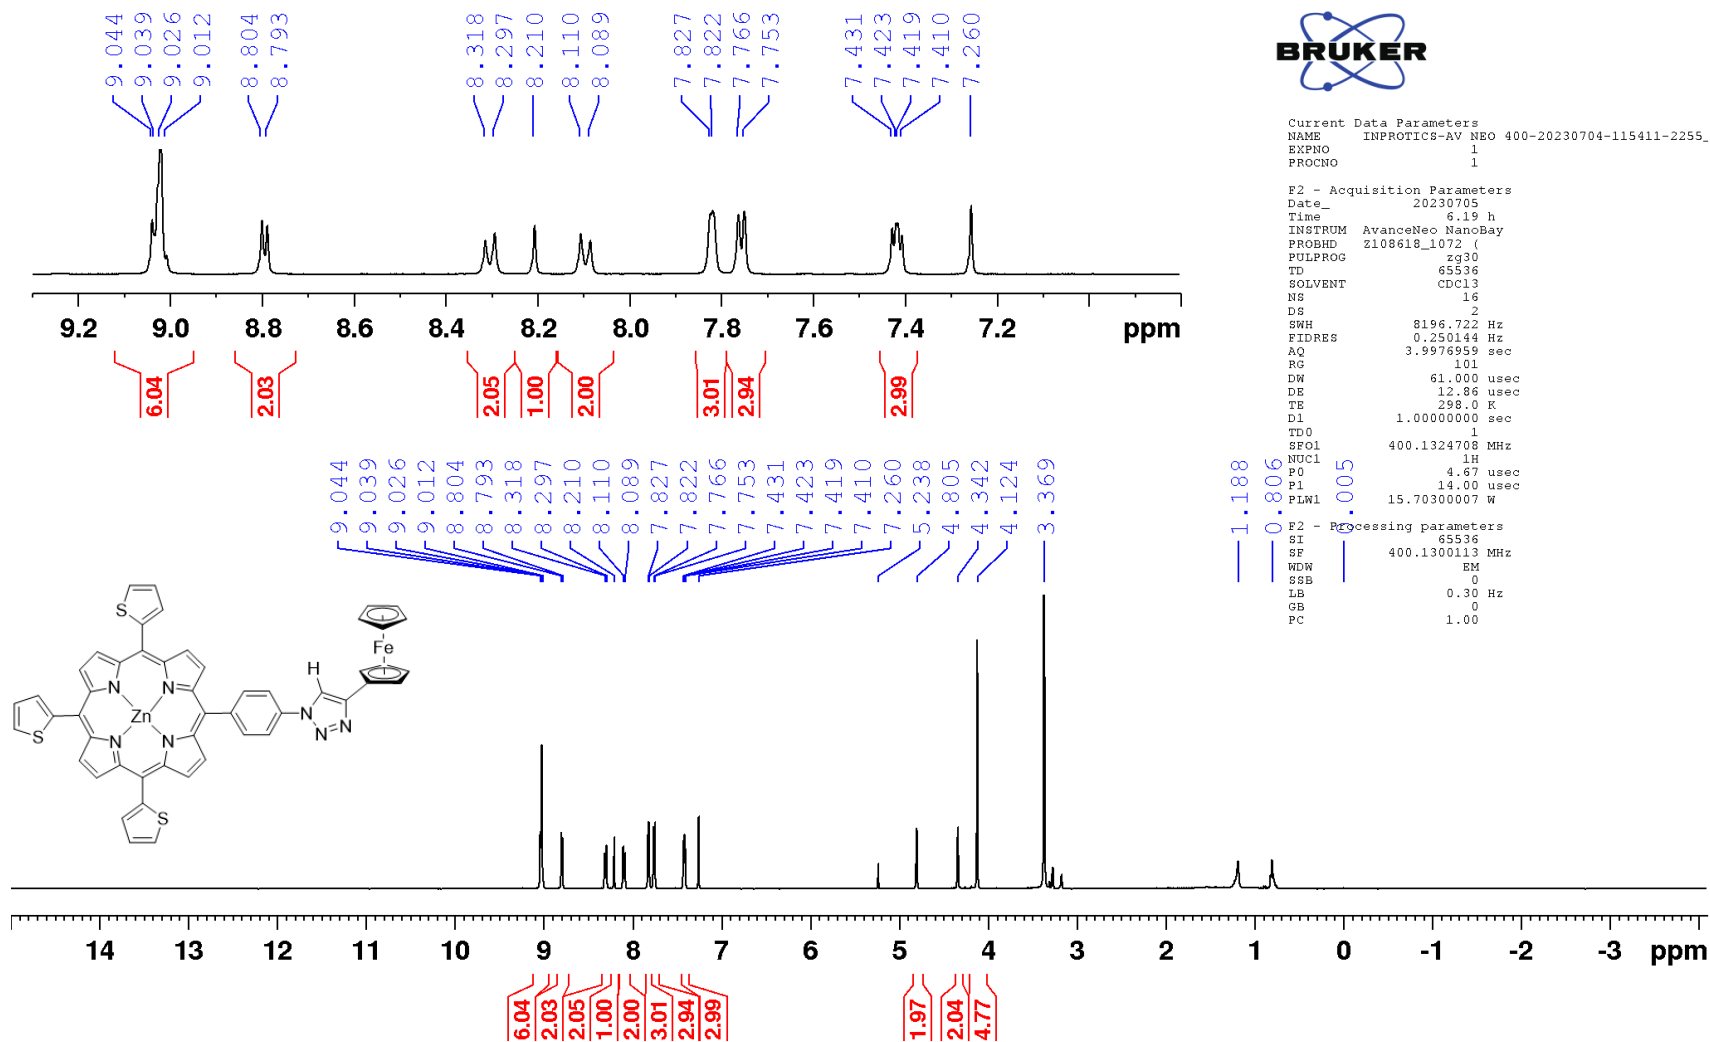

**Figure S22.**  $^1\text{H}$  NMR spectrum of **Zn-9**



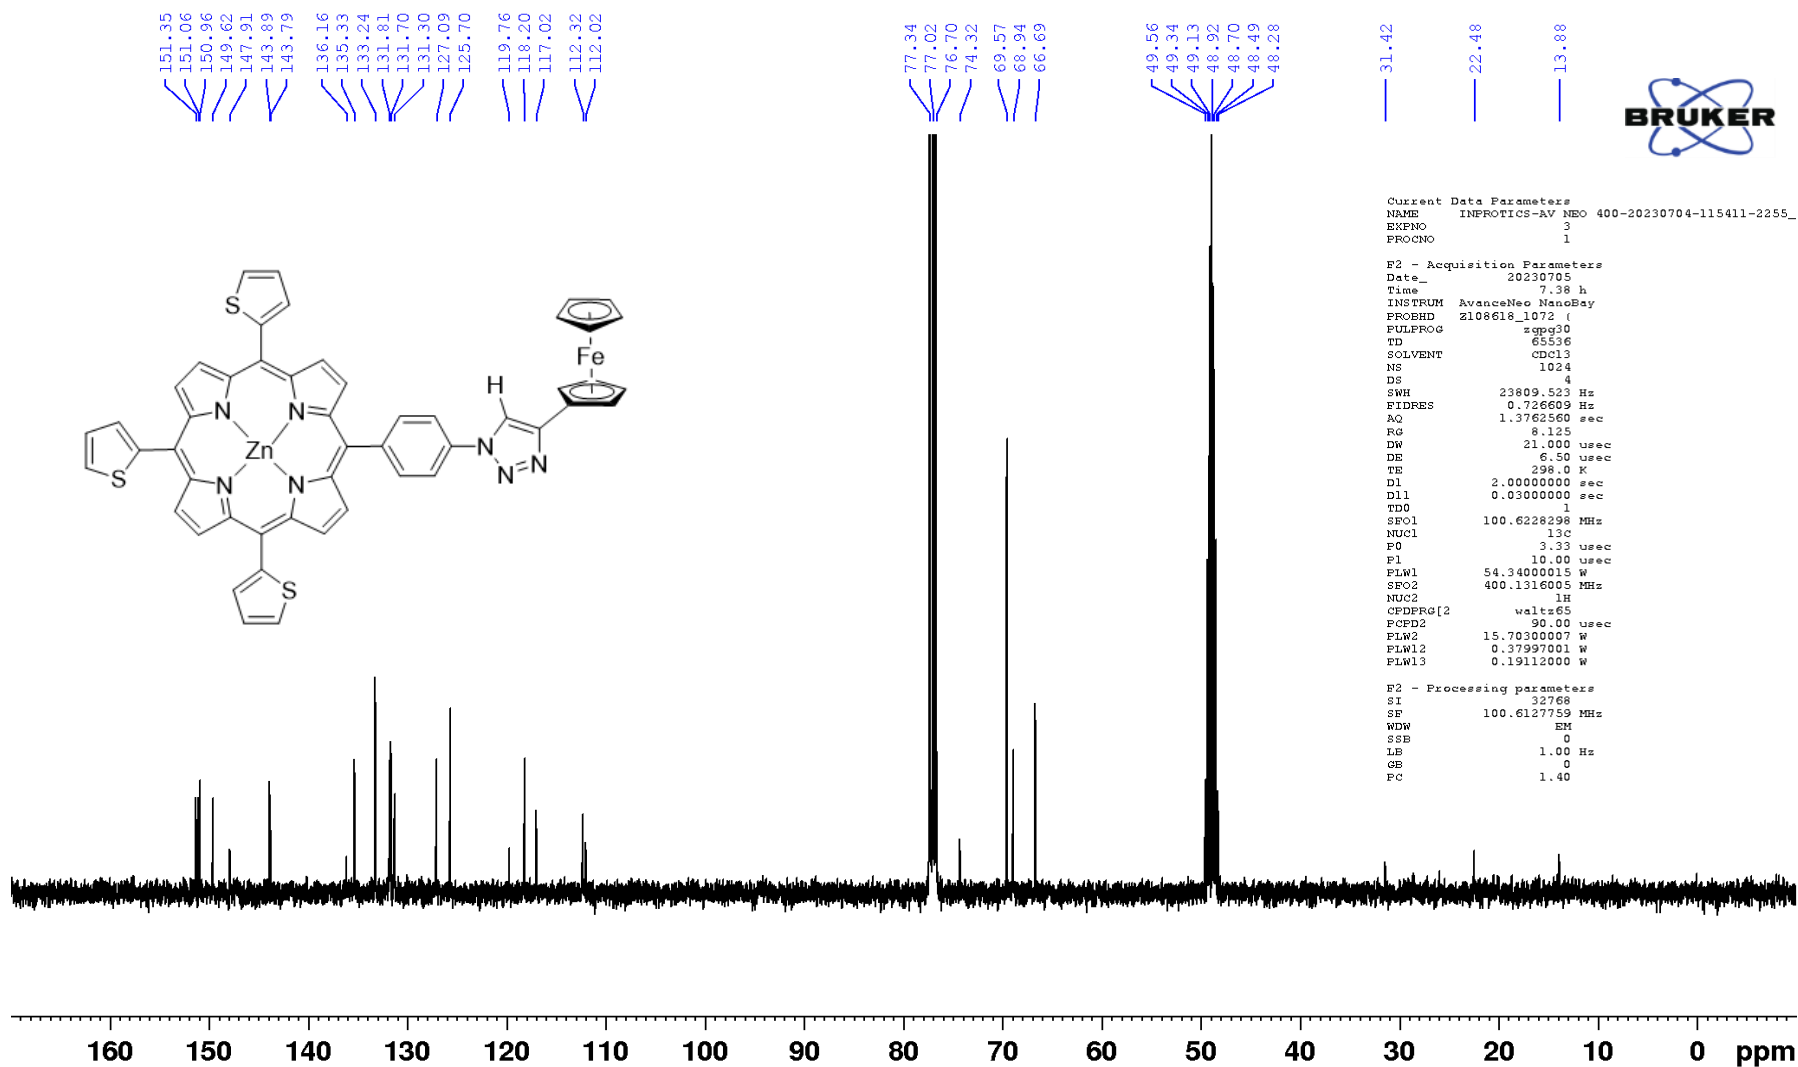

Figure S23. <sup>13</sup>C NMR spectrum of Zn-9

## Sample Information

|                |                  |                    |                                                                |
|----------------|------------------|--------------------|----------------------------------------------------------------|
| Name           | MR-SB-VSS-SNS-22 | Data File Path     | X:\Projects\MASS Data\Data\APRIL-2024\MR-SB-VSS-SNS-22.d       |
| Sample ID      |                  | Acq. Time (Local)  | 4/16/2024 4:37:25 PM (UTC+05:30)                               |
| Instrument     | LCMSQTOF-G6545B  | Method Path (Acq)  | D:\Projects\MASS Data\Methods\A1BL_POS_100-1500_4000_800_220.m |
| MS Type        | QTOF             | Version (Acq SW)   | 6200 series TOF/6500 series Q TOF (11.0.203.0)                 |
| Inj. Vol. (ul) | 0.5              | IRM Status         | Success                                                        |
| Position       | PL-F8            | Method Path (DA)   | D:\MassHunter\Report Templates\REPORT_METHOD\HRMS_1.m          |
| Plate Pos.     |                  | Target Source Path |                                                                |
| Operator       | SYSTEM (SYSTEM)  | Result Summary     | 1 qualified (1 targets)                                        |

## Sample Spectra

## + Scan (rt: 0.289 min)

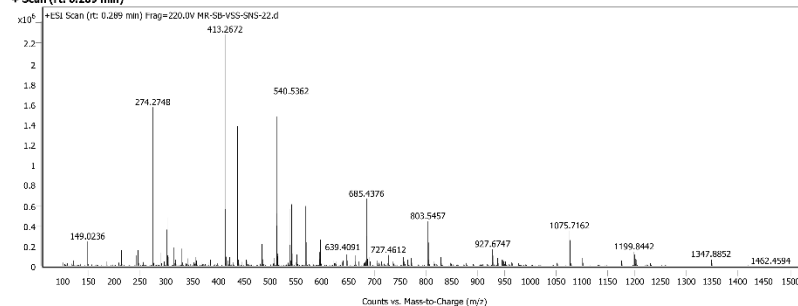

## + Scan (rt: 0.223-0.705 min)

## Peak 1 from + TIC Scan

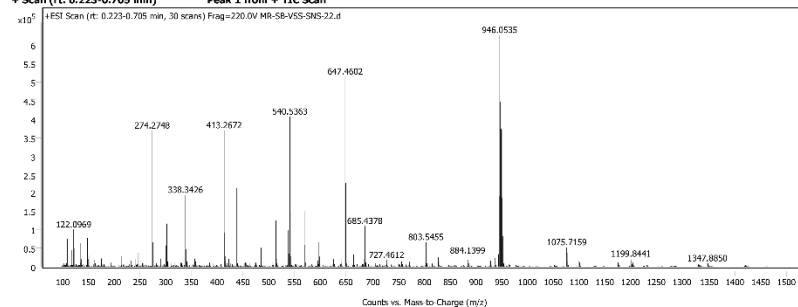

## Compound Details

Cpd. 1: C<sub>50</sub>H<sub>31</sub>FeN<sub>7</sub>S<sub>3</sub>Zn

| Formula                                                            | m/z      | Observed M/Z     | Difference Da    | Difference PPM   | Score |
|--------------------------------------------------------------------|----------|------------------|------------------|------------------|-------|
| C <sub>50</sub> H <sub>31</sub> FeN <sub>7</sub> S <sub>3</sub> Zn | 946.0534 | 946.053445744389 | 1.15305232304763 | 1.22268539714286 | 81.75 |

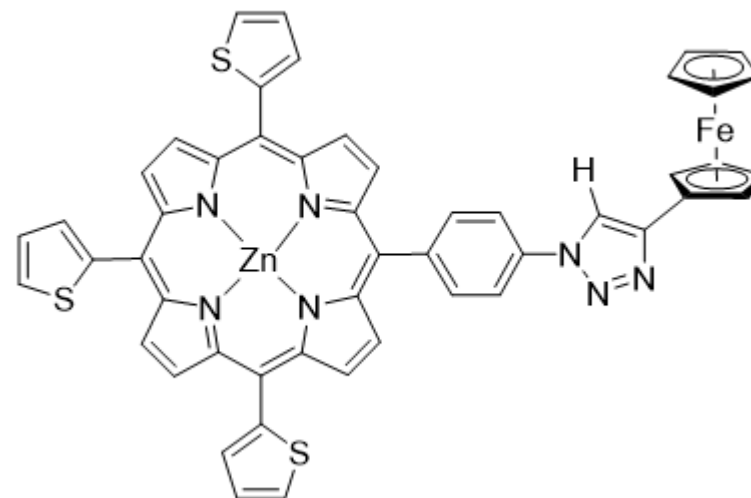Chemical Formula: C<sub>50</sub>H<sub>31</sub>FeN<sub>7</sub>S<sub>3</sub>ZnExpected Mol. Wt. = 946.0534 [M+H]<sup>+</sup>Observed Mol. Wt. = 946.0534 [M+H]<sup>+</sup>

Figure S24. LCMS QTOF spectrum of Zn-9

**Table S1.** The selected dihedral angles (in °) in the lowest energy conformers of **8**, **9**, **10**, Zn-8, Zn-9 and Zn-10.

| 'Click' conjugates | $\alpha$ | $\beta$ | $\gamma$ |
|--------------------|----------|---------|----------|
| <b>8</b>           | 65       | 31      | 5        |
| <b>9</b>           | 66       | 30      | 3        |
| <b>10</b>          | 66       | 31      | -8       |
| <b>Zn-8</b>        | 65       | 31      | 5        |
| <b>Zn-9</b>        | 66       | 30      | 3        |
| <b>Zn-10</b>       | 66       | 31      | -8       |

**Table S2.** Optimized Geometries (Cartesian coordinates) of 'click' conjugates.

Optimized geometries (PCM<sub>(dichloromethane)</sub>B3LYP-D3, Cartesian coordinates in Å) and energies of 'click' conjugates (in a.u.). Notation: E = total electronic energy, Tc = thermal correction at 298K to obtain the Gibbs free energy, Nimag = number of imaginary frequencies.

| <b>8</b>                              | <b>9</b>                              |
|---------------------------------------|---------------------------------------|
| E = -2658.1750444                     | E = -3627.1289074                     |
| Nimag = 0                             | Nimag = 0                             |
| Tc = 0.626130                         | Tc = 0.611517                         |
| N 5.53916400 -1.20485700 0.06697000   | N -5.23727900 -1.19855300 -0.03218500 |
| N 2.66000100 -1.62010200 -0.14151300  | N -2.33608800 -1.62255700 0.10573600  |
| N 5.21423200 1.73838300 0.09699400    | N -4.91170700 1.70660500 -0.03141900  |
| N 2.33962700 1.31961600 -0.18059800   | N -2.01454400 1.28282700 0.16879100   |
| C 6.82139100 -0.83633600 0.35480300   | C -6.54680500 -0.84187300 -0.16514600 |
| C 7.61999100 -1.99493400 0.73220600   | C -7.38880000 -2.01726600 -0.36421200 |
| C 6.80347100 -3.06914400 0.63599500   | C -6.56187700 -3.08706500 -0.33552400 |
| C 5.50752200 -2.56293400 0.19952500   | C -5.21819700 -2.56141000 -0.11560500 |
| H 8.65118800 -1.97883200 1.04387000   | H -8.45508700 -2.00657000 -0.52349800 |
| H 7.03498900 -4.09580400 0.86647800   | H -6.81499700 -4.12752600 -0.46054600 |
| C 4.38651700 -3.39141800 -0.03941500  | C -4.07996700 -3.38269500 -0.00440000 |
| C 7.34158000 0.47646300 0.29542600    | C -7.05662700 0.47217000 -0.13400000  |
| C 1.90550700 -3.70451300 -0.52346500  | C -1.59270200 -3.73390100 0.33433700  |
| C 0.83260300 -2.85747300 -0.57459500  | C -0.51017000 -2.90126400 0.41595600  |
| C 1.30078700 -1.52735800 -0.32728700  | C -0.97209800 -1.55344500 0.26381700  |
| C 3.07221000 -2.92710100 -0.23356700  | C -2.75905800 -2.92823800 0.13271100  |
| H 1.89705700 -4.77110000 -0.66443800  | H -1.60065900 -4.80751400 0.42143000  |
| H -0.19292500 -3.11880100 -0.77543300 | H 0.51680700 -3.18226700 0.57941900   |
| C 0.52580900 -0.36057500 -0.27571300  | C -0.19442600 -0.38732800 0.27690100  |
| C 4.81679700 3.03897500 -0.10438300   | C -4.49583800 3.01395300 0.04325700   |
| C 6.01112300 3.80818100 -0.27440700   | C -5.68081900 3.81929700 0.09115100   |
| C 7.08103100 2.96427900 -0.15786500   | C -6.76338200 2.98603000 0.03916000   |
| C 6.58480000 1.64413900 0.08887200    | C -6.28343200 1.63791800 -0.04551100  |
| H 6.03799800 4.86648500 -0.46738500   | H -5.68400300 4.89365700 0.16997000   |
| H 8.12262900 3.21810000 -0.25468700   | H -7.80503200 3.25941900 0.06252400   |
| C 0.16618200 2.11287500 0.03744700    | C 0.16023000 2.10504400 0.11268600    |
| C 0.98606000 3.18861400 0.08581100    | C -0.66702900 3.17380000 0.05152100   |

|                                       |                                       |
|---------------------------------------|---------------------------------------|
| C 2.34285400 2.67837100 -0.07596200   | C -2.02510400 2.64431600 0.09751200   |
| C 1.02412100 0.94934400 -0.14520400   | C -0.69570200 0.92573500 0.19528900   |
| H -0.90701300 2.09715400 0.14019500   | H 1.23812100 2.10268300 0.08819100    |
| H 0.71335700 4.21886200 0.24380100    | H -0.40273800 4.21595400 -0.02841900  |
| C 3.49012800 3.50519500 -0.13008300   | C -3.17092200 3.46706100 0.07379900   |
| C -0.95415600 -0.53908600 -0.37688200 | C 1.28438400 -0.57118900 0.38684900   |
| C -1.66589500 -1.20493200 0.62757900  | C 2.01004400 -1.17077500 -0.64854600  |
| C -3.04334100 -1.37204900 0.53835800  | C 3.38608600 -1.34482300 -0.55066300  |
| C -3.72608400 -0.85957200 -0.56443700 | C 4.05368400 -0.90337100 0.59135900   |
| C -3.03679200 -0.19351100 -1.57826000 | C 3.34995800 -0.30308900 1.63598900   |
| C -1.65934000 -0.04242900 -1.48042400 | C 1.97362000 -0.14722700 1.52987600   |
| H -1.13551700 -1.59854700 1.48605900  | H 1.49204200 -1.50805500 -1.53802300  |
| H -3.57591400 -1.90796500 1.31371000  | H 3.92865400 -1.83175900 -1.35087600  |
| H -3.57992600 0.19566000 -2.42839200  | H 3.88108500 0.03137400 2.51638500    |
| H -1.12181100 0.47280400 -2.26700300  | H 1.42505800 0.31592200 2.34089600    |
| C -8.93612800 1.98245900 -0.23715200  | C 9.25372500 1.95439200 0.35106000    |
| C -10.12479300 1.75793900 -0.99331800 | C 10.43607900 1.72448600 1.11549200   |
| C -9.30808200 2.15474100 1.12940300   | C 9.63796200 2.14679200 -1.00941600   |
| C -10.72799400 2.03737800 1.21803900  | C 11.05911700 2.03635100 -1.08602800  |
| C -11.23250500 1.79260800 -0.09389100 | C 11.55211300 1.77574800 0.22722900   |
| Fe -9.91011100 0.29579600 0.45218700  | Fe 10.24107600 0.28122700 -0.35173400 |
| C -8.61167000 -1.29869400 0.24440800  | C 8.94756800 -1.32179000 -0.17888900  |
| C -8.98945700 -1.13870700 1.61739900  | C 9.33816300 -1.14079300 -1.54566100  |
| C -9.80676100 -1.52962600 -0.51019000 | C 10.13619900 -1.55817100 0.58417100  |
| C -10.40452300 -1.27849100 1.70499700 | C 10.75460000 -1.27320800 -1.62121500 |
| C -10.90806500 -1.51874500 0.39212000 | C 11.24623300 -1.52989300 -0.30695600 |
| H -7.92854600 1.97064300 -0.62405500  | H 8.24250000 1.93358800 0.72800800    |
| H -10.17304400 1.55854200 -2.05259700 | H 10.47519000 1.51114600 2.17243300   |
| H -11.31329400 2.08840700 2.12311800  | H 11.65279000 2.10187800 -1.98469800  |
| H -12.26603400 1.62440200 -0.35436500 | H 12.58379900 1.60814300 0.49528800   |
| H -9.84945700 -1.66025700 -1.57924000 | H 10.16908400 -1.70369400 1.65164200  |
| H -11.94606500 -1.63654000 0.12262100 | H 12.28205000 -1.64688600 -0.02884900 |
| H -8.32152700 -0.92324200 2.43694700  | H 8.67734700 -0.91760700 -2.36889000  |
| H -8.63189800 2.31099300 1.95571100   | H 8.96901400 2.31144800 -1.83996800   |
| H -10.99390300 -1.18097600 2.60336700 | H 11.35227500 -1.16083300 -2.51234300 |
| C 4.61100700 -4.83756500 -0.10412600  | C -4.28359200 -4.85033300 -0.02404600 |
| C 5.53444800 -5.59930200 -0.76644000  | C -4.85145200 -5.63841300 0.94087400  |
| O 3.75613800 -5.66637800 0.58546300   | C -4.91553200 -7.01808100 0.58511100  |
| C 5.23881100 -6.96553400 -0.46896500  | H -5.20771100 -5.23551300 1.87969700  |
| H 6.31673100 -5.22145600 -1.40418500  | C -4.40118700 -7.26834600 -0.65455100 |
| C 4.15525400 -6.94807100 0.35197200   | H -5.32419800 -7.78797300 1.22595600  |
| H 5.75957900 -7.84031700 -0.82440100  | H -4.32196900 -8.21267900 -1.17164800 |
| H 3.57667600 -7.71635600 0.83687200   | C -2.96541500 4.93488800 0.08878200   |
| C 3.28847500 4.95082500 -0.25273100   | C -2.54101800 5.71928800 1.12738800   |
| C 2.49822200 5.71123100 -1.07067800   | C -2.42558000 7.10004100 0.78858800   |
| O 4.02443700 5.78217100 0.56039800    | H -2.32281000 5.31336600 2.10632300   |
| C 2.75435300 7.07890500 -0.74452600   | C -2.75721200 7.35452100 -0.51106500  |
| H 1.83161200 5.33179200 -1.82770500   | H -2.11221100 7.86756500 1.48368200   |
| C 3.68416300 7.06362400 0.24731400    | H -2.76144700 8.30049700 -1.03121200  |
| H 2.31037100 7.95303600 -1.19350000   | C -8.52423000 0.66359500 -0.20254900  |

|                                                                                                                                                                                                                                                                                                                                                                                                                                                                                                                                                                                                                                                                                                                                                                                                                                                                                                                                                                                                                                                                                                                                                                                                        |                                                                                                                                                                                                                                                                                                                                                                                                                                                                                                                                                                                                                                                                                                                                                                                                                                                                                                                                                                                                                                                                                                                                                                                                 |
|--------------------------------------------------------------------------------------------------------------------------------------------------------------------------------------------------------------------------------------------------------------------------------------------------------------------------------------------------------------------------------------------------------------------------------------------------------------------------------------------------------------------------------------------------------------------------------------------------------------------------------------------------------------------------------------------------------------------------------------------------------------------------------------------------------------------------------------------------------------------------------------------------------------------------------------------------------------------------------------------------------------------------------------------------------------------------------------------------------------------------------------------------------------------------------------------------------|-------------------------------------------------------------------------------------------------------------------------------------------------------------------------------------------------------------------------------------------------------------------------------------------------------------------------------------------------------------------------------------------------------------------------------------------------------------------------------------------------------------------------------------------------------------------------------------------------------------------------------------------------------------------------------------------------------------------------------------------------------------------------------------------------------------------------------------------------------------------------------------------------------------------------------------------------------------------------------------------------------------------------------------------------------------------------------------------------------------------------------------------------------------------------------------------------|
| H 4.18084500 7.83375000 0.81333100<br>C 8.78488200 0.66272000 0.47218600<br>C 9.52446300 1.49544900 1.26657600<br>O 9.63487400 -0.13605100 -0.25653200<br>C 10.89972200 1.19775800 1.01579600<br>H 9.12629700 2.21672800 1.96160100<br>C 10.90792000 0.20463800 0.08699800<br>H 11.76265000 1.65687200 1.47119100<br>H 11.69160100 -0.33998500 -0.41240000<br>N -5.13747000 -1.01116900 -0.65989800<br>C -6.05824200 -1.06161600 0.34053000<br>C -7.26731300 -1.20940500 -0.30450400<br>H -5.79646900 -0.96446200 1.37866400<br>N -5.74463600 -1.12876300 -1.86511800<br>N -7.02095700 -1.24689100 -1.65127200<br>H 4.57825700 0.95470300 0.17398300<br>H 3.28472000 -0.83201300 -0.02393200                                                                                                                                                                                                                                                                                                                                                                                                                                                                                                           | C -9.26624300 1.17374300 -1.23424500<br>C -10.66270800 1.24257700 -0.95232300<br>H -8.81944700 1.48224400 -2.17020100<br>C -10.97158700 0.79133800 0.29869800<br>H -11.40213100 1.60861400 -1.65211800<br>H -11.94050400 0.72882700 0.77066800<br>N 5.46365900 -1.06129100 0.69623400<br>C 6.39635600 -1.06856600 -0.29441000<br>C 7.59714700 -1.25013400 0.35750900<br>H 6.14808000 -0.92236700 -1.33011000<br>N 6.05609600 -1.23550500 1.90193600<br>N 7.33455500 -1.34774000 1.69815700<br>H -4.29563500 0.90312700 -0.03468800<br>H -2.94524600 -0.81885100 0.01604400<br>S -3.22072400 5.90629100 -1.34554800<br>S -9.55672000 0.26993400 1.15563000<br>S -3.82482100 -5.81748500 -1.41013000                                                                                                                                                                                                                                                                                                                                                                                                                                                                                              |
| <b>10</b><br>E = -2782.8385439<br>Nimag = 0<br>Tc = 0.784537                                                                                                                                                                                                                                                                                                                                                                                                                                                                                                                                                                                                                                                                                                                                                                                                                                                                                                                                                                                                                                                                                                                                           | <b>Zn-8</b><br>E = -2722.6714224<br>Nimag = 0<br>Tc = 0.603060                                                                                                                                                                                                                                                                                                                                                                                                                                                                                                                                                                                                                                                                                                                                                                                                                                                                                                                                                                                                                                                                                                                                  |
| N -4.92492700 -1.25258100 0.05997000<br>N -2.02885500 -1.60986900 -0.19442300<br>N -4.67086700 1.66743300 -0.00468900<br>N -1.76942900 1.31089900 -0.19229100<br>C -6.25027700 -0.92220000 0.08845400<br>C -7.08165300 -2.11767200 0.00120100<br>C -6.23321300 -3.16990800 -0.06182500<br>C -4.88476600 -2.61572100 -0.01286200<br>H -8.15930400 -2.13458600 -0.02591000<br>H -6.48140400 -4.21534900 -0.15023300<br>C -3.72415800 -3.41501200 -0.04634700<br>C -6.78328700 0.37891900 0.18021500<br>C -1.20485800 -3.69961100 -0.06248300<br>C -0.14491300 -2.83930700 -0.14624400<br>C -0.65909100 -1.50445400 -0.23741100<br>C -2.41155700 -2.92754100 -0.09903600<br>H -1.16904300 -4.77238400 0.02755300<br>H 0.90198300 -3.09302400 -0.13526400<br>C 0.08315900 -0.32091100 -0.34544800<br>C -4.27888200 2.98480800 0.02555000<br>C -5.46510200 3.75738800 0.24677800<br>C -6.52488600 2.89669000 0.33253500<br>C -6.03106000 1.56186700 0.16698300<br>H -5.48633600 4.83044100 0.33809700<br>H -7.55781500 3.14819100 0.50586300<br>C 0.35277800 2.17535500 -0.58223500<br>C -0.49610100 3.22740400 -0.52285200<br>C -1.82136500 2.67433000 -0.26638400<br>C -0.45579300 0.98081600 -0.36267400 | N -5.32651800 -1.26365600 -0.03334600<br>N -2.40512500 -1.57744100 0.10793900<br>N -5.00383900 1.66945300 -0.11897700<br>N -2.09806100 1.35355800 0.22168400<br>C -6.62864300 -0.90356000 -0.26722500<br>C -7.40316800 -2.08978900 -0.55545800<br>C -6.55435500 -3.15022700 -0.48172000<br>C -5.24759000 -2.62853100 -0.14355900<br>H -8.45214700 -2.11077700 -0.79950500<br>H -6.78591800 -4.18570800 -0.66775100<br>C -4.07606400 -3.40425800 0.02018000<br>C -7.13765800 0.41698500 -0.25799500<br>C -1.58527200 -3.69552900 0.43823400<br>C -0.52984500 -2.83979000 0.50854800<br>C -1.04787200 -1.50574900 0.29562200<br>C -2.76342500 -2.89753500 0.17504700<br>H -1.56543900 -4.76569800 0.55831300<br>H 0.50032500 -3.08876300 0.70583300<br>C -0.27573800 -0.32625100 0.30262800<br>C -4.65641300 2.98752100 0.03652400<br>C -5.85909200 3.78201800 0.15458200<br>C -6.91431700 2.92911600 0.05975800<br>C -6.37321300 1.59919000 -0.12092600<br>H -5.89502400 4.84792900 0.30563600<br>H -7.96063300 3.17449900 0.13381400<br>C 0.04103700 2.17890600 0.10458700<br>C -0.80676100 3.24181800 0.03974300<br>C -2.15340100 2.71856000 0.12547600<br>C -0.77347600 0.99036100 0.22370300 |

H 1.41366900 2.19387600 -0.77420000  
H -0.26450100 4.27200100 -0.65511300  
C -2.97323000 3.47297500 -0.12659200  
C 1.56673300 -0.46984700 -0.44617800  
C 2.15464800 -1.06267800 -1.57060900  
C 3.53281300 -1.21179600 -1.66574800  
C 4.34399600 -0.75161100 -0.62830800  
C 3.78166200 -0.14754400 0.49596300  
C 2.40014800 -0.01770600 0.58334100  
H 1.52361400 -1.41434400 -2.37780200  
H 3.98385500 -1.67520500 -2.53234900  
H 4.41289800 0.23137600 1.28972300  
H 1.96197200 0.44794500 1.45756500  
C 9.72284900 1.92766800 -0.08585000  
C 10.06433000 1.98984500 1.29800300  
C 10.91927400 1.68988200 -0.82543900  
C 12.00139700 1.60631600 0.10148000  
C 11.47322300 1.79116200 1.41390200  
Fe 10.58860200 0.14981600 0.51341100  
C 9.21105500 -1.35572700 0.18570400  
C 10.40199000 -1.59832500 -0.57179800  
C 9.57898300 -1.30928900 1.56983200  
C 11.49078200 -1.70632900 0.33932800  
C 10.98347200 -1.52961200 1.66088200  
H 8.72754600 1.99484400 -0.49793200  
H 9.37398900 2.12769600 2.11585900  
H 13.03178900 1.40031500 -0.14386800  
H 12.03441000 1.75089700 2.33468200  
H 8.91268300 -1.11200400 2.39527500  
H 11.56554000 -1.52410400 2.56923600  
H 10.45152000 -1.65883000 -1.64682400  
H 10.98714400 1.55824100 -1.89417600  
H 12.52465200 -1.86027100 0.07211800  
N 5.75572300 -0.90184700 -0.72252600  
C 6.66146600 -1.08631000 0.27608300  
C 7.87856400 -1.16466100 -0.36599100  
H 6.37980100 -1.17257200 1.31004000  
N 6.37992600 -0.87161300 -1.92425000  
N 7.65174900 -1.03114700 -1.71014100  
C -3.88800800 -4.90035600 -0.02196800  
C -4.39963300 -5.54610400 1.10978300  
C -3.53042200 -5.68256100 -1.12617500  
C -4.54803700 -6.92980300 1.13378400  
H -4.67428000 -4.95752700 1.97774100  
C -3.68476200 -7.06590200 -1.09908600  
H -3.13360400 -5.20056300 -2.01252600  
C -4.19701200 -7.71456700 0.02967600  
H -4.93852200 -7.40776300 2.02641300  
H -3.40360400 -7.64996100 -1.96943500  
C -8.26508600 0.52880900 0.30423600

H 1.11754600 2.19839800 0.04974200  
H -0.54488800 4.27956500 -0.08258700  
C -3.33767800 3.49443400 0.10316500  
C 1.20636200 -0.48970500 0.39732100  
C 1.92105600 -1.12115500 -0.62763900  
C 3.29853800 -1.28887500 -0.54410800  
C 3.98124000 -0.80913600 0.57335900  
C 3.29107800 -0.17292700 1.60555700  
C 1.91284000 -0.02278600 1.51316000  
H 1.39073300 -1.49194200 -1.49619600  
H 3.83085300 -1.80213000 -1.33481600  
H 3.83364300 0.19136300 2.46703000  
H 1.37505300 0.46589100 2.31645900  
C 9.21637300 2.00144200 0.25951300  
C 10.40458000 1.76112800 1.01155100  
C 9.58710800 2.18106200 -1.10643700  
C 11.00579900 2.05243800 -1.19882500  
C 11.51078500 1.79334100 0.11017800  
Fe 10.17472400 0.31197700 -0.44466100  
C 8.86307000 -1.27288400 -0.24652700  
C 9.23962800 -1.10551300 -1.61897100  
C 10.05759300 -1.52007700 0.50380100  
C 10.65327800 -1.25673500 -1.71049800  
C 11.15724400 -1.51154100 -0.40055100  
H 8.20945800 1.99513500 0.64829200  
H 10.45322400 1.55315700 2.06916600  
H 11.58974600 2.10542400 -2.10466600  
H 12.54336000 1.61438700 0.36726400  
H 10.10119500 -1.65963400 1.57168100  
H 12.19470700 -1.64039200 -0.13404800  
H 8.57196700 -0.87823900 -2.43555400  
H 8.91062100 2.34918300 -1.93016100  
H 11.24168700 -1.15740000 -2.60930900  
C -4.24690900 -4.86156700 0.04517000  
C -5.07732900 -5.68697900 0.75153500  
O -3.43215200 -5.62517900 -0.75885200  
C -4.76266400 -7.02714500 0.36429500  
H -5.81073600 -5.36851600 1.47433400  
C -3.76182600 -6.93110600 -0.55053100  
H -5.21683500 -7.93655600 0.72439300  
H -3.20410200 -7.65399500 -1.12196100  
C -3.17694600 4.95081800 0.18389400  
C -2.47735400 5.76377100 1.03231500  
O -3.85393500 5.72889900 -0.72703800  
C -2.73188600 7.11079900 0.62516800  
H -1.87092100 5.43293500 1.85968900  
C -3.56983700 7.03106800 -0.44223400  
H -2.34758200 8.01372200 1.07242900  
H -4.03091300 7.76416700 -1.08264200  
C -8.58596900 0.58145000 -0.42716000

|                                                                                                                                                                                                                                                                                                                                                                                                                                                                                                                                                                                                                                                                                                                                                                                                                                                                                                                                                                                                                                                                                                                                                                                                                                                                                                                                                                      |                                                                                                                                                                                                                                                                                                                                                                                                                                                                                                                                                                             |
|----------------------------------------------------------------------------------------------------------------------------------------------------------------------------------------------------------------------------------------------------------------------------------------------------------------------------------------------------------------------------------------------------------------------------------------------------------------------------------------------------------------------------------------------------------------------------------------------------------------------------------------------------------------------------------------------------------------------------------------------------------------------------------------------------------------------------------------------------------------------------------------------------------------------------------------------------------------------------------------------------------------------------------------------------------------------------------------------------------------------------------------------------------------------------------------------------------------------------------------------------------------------------------------------------------------------------------------------------------------------|-----------------------------------------------------------------------------------------------------------------------------------------------------------------------------------------------------------------------------------------------------------------------------------------------------------------------------------------------------------------------------------------------------------------------------------------------------------------------------------------------------------------------------------------------------------------------------|
| C -9.01680700 1.11990900 -0.71800100<br>C -8.93817000 0.07696300 1.44530100<br>C -10.39767400 1.25163600 -0.60159700<br>H -8.51458900 1.46689600 -1.61397100<br>C -10.31859800 0.21494300 1.55907300<br>H -8.37280500 -0.38400200 2.24719500<br>C -11.07333400 0.80508300 0.53937400<br>H -10.95955500 1.70348600 -1.41266700<br>H -10.81698500 -0.14179200 2.45462000<br>C -2.81008100 4.95856100 -0.13555200<br>C -3.33154800 5.73344400 -1.17802700<br>C -2.12773400 5.61111900 0.89790700<br>C -3.17244300 7.11641100 -1.18588900<br>H -3.85454200 5.24514600 -1.99254200<br>C -1.97508000 6.99458100 0.88798500<br>H -1.71661000 5.02739400 1.71365500<br>C -2.49495900 7.77251400 -0.15244600<br>H -3.57650100 7.69391300 -2.01104200<br>H -1.44354200 7.47724100 1.70176200<br>C -4.39278200 -9.21077800 0.04558300<br>H -4.29019200 -9.61536100 1.05503900<br>H -5.39386600 -9.47428200 -0.31260600<br>H -3.67102300 -9.71435200 -0.60136100<br>C -12.56575000 0.98075400 0.67748800<br>H -12.80152100 1.94880500 1.13270000<br>H -13.06232100 0.94760600 -0.29490900<br>H -13.00159100 0.20608800 1.31230500<br>C -2.35435100 9.27498900 -0.14518200<br>H -2.33619700 9.67850900 -1.16003600<br>H -3.19689900 9.74048200 0.37766100<br>H -1.44046400 9.58744600 0.36505300<br>H -4.04029400 0.88153400 -0.10244900<br>H -2.66720000 -0.82405000 -0.19430800 | C -9.34312400 1.35164400 -1.26583900<br>O -9.42028100 -0.17356900 0.36506000<br>C -10.71320000 1.06091100 -0.97718800<br>H -8.95977500 2.02899800 -2.01148700<br>C -10.70144800 0.13320300 0.01641400<br>H -11.58579700 1.48193000 -1.45080000<br>H -11.47387200 -0.38268600 0.56176600<br>N 5.39237600 -0.96733400 0.66569600<br>C 6.31222800 -1.00757100 -0.33594300<br>C 7.52029200 -1.17836700 0.30542700<br>H 6.05129400 -0.88960600 -1.37211100<br>N 5.99906200 -1.11237900 1.86799500<br>N 7.27445800 -1.23764600 1.65134800<br>Zn -3.71250300 0.04902200 0.06988300 |
| <b>Zn-9</b><br>E = -3691.6254379<br>Nimag = 0<br>Tc = 0.587715                                                                                                                                                                                                                                                                                                                                                                                                                                                                                                                                                                                                                                                                                                                                                                                                                                                                                                                                                                                                                                                                                                                                                                                                                                                                                                       | <b>Zn-10</b><br>E = -2847.3341725<br>Nimag = 0<br>Tc = 0.760208                                                                                                                                                                                                                                                                                                                                                                                                                                                                                                             |
| N -5.03856400 -1.27024900 -0.01260900<br>N -2.11653400 -1.58409800 0.09294600<br>N -4.72348700 1.64937800 -0.05563200<br>N -1.80978400 1.33565100 0.19002000<br>C -6.35531600 -0.91529800 -0.14417100<br>C -7.15420300 -2.11167600 -0.31179900<br>C -6.30124900 -3.17107200 -0.27424700<br>C -4.96863100 -2.63788400 -0.08043500<br>H -8.22190500 -2.13260000 -0.45960000<br>H -6.54331500 -4.21617300 -0.38038600<br>C -3.79113600 -3.40857900 0.01065400<br>C -6.86049500 0.40285000 -0.14447500                                                                                                                                                                                                                                                                                                                                                                                                                                                                                                                                                                                                                                                                                                                                                                                                                                                                   | N -4.74510400 -1.31760200 0.09919300<br>N -1.83478300 -1.57110800 -0.21952900<br>N -4.49988900 1.60835000 0.00468400<br>N -1.57675400 1.35566900 -0.16223600<br>C -6.07652000 -0.98813200 0.14662800<br>C -6.86316800 -2.20209300 0.09217100<br>C -5.99019800 -3.24417000 0.02089600<br>C -4.65512000 -2.68470900 0.03008100<br>H -7.94021400 -2.24870700 0.09028900<br>H -6.22713600 -4.29347700 -0.04966100<br>C -3.46188600 -3.43474200 -0.04511000<br>C -6.60637900 0.31791200 0.21185100                                                                               |

|                                       |                                       |
|---------------------------------------|---------------------------------------|
| C -1.29191400 -3.71409800 0.31741000  | C -0.93927900 -3.68205000 -0.11371400 |
| C -0.23339700 -2.86169500 0.39467200  | C 0.09956200 -2.80663000 -0.19833600  |
| C -0.75510300 -1.51863800 0.24610400  | C -0.46753200 -1.47614400 -0.26900100 |
| C -2.47590100 -2.90522900 0.12413100  | C -2.15872000 -2.90215100 -0.13113100 |
| H -1.27725900 -4.78845500 0.40540500  | H -0.88541200 -4.75546800 -0.03000200 |
| H 0.80108100 -3.11858300 0.55591300   | H 1.15205400 -3.04036900 -0.19496600  |
| C 0.01570200 -0.33732200 0.27808100   | C 0.27530700 -0.27954300 -0.34831700  |
| C -4.37136100 2.97231000 0.01884100   | C -4.16754000 2.93898600 0.02912100   |
| C -5.57298400 3.78016600 0.05661200   | C -5.36876100 3.72000600 0.23634000   |
| C -6.63110100 2.92668500 0.00009700   | C -6.40722000 2.84428500 0.32496200   |
| C -6.09187900 1.58437500 -0.07509800  | C -5.85814400 1.51338100 0.17257000   |
| H -5.59911000 4.85499300 0.13652300   | H -5.40867800 4.79411100 0.31955500   |
| H -7.67998300 3.17484200 0.01999200   | H -7.44653700 3.07570900 0.49363300   |
| C 0.32503900 2.17977200 0.16838000    | C 0.51213400 2.24114600 -0.51137100   |
| C -0.52861300 3.23846700 0.10920400   | C -0.36187800 3.28258100 -0.44573400  |
| C -1.87260200 2.70235900 0.12718100   | C -1.67808400 2.72319900 -0.22007600  |
| C -0.48462800 0.98021100 0.22386900   | C -0.25565000 1.02717800 -0.32863600  |
| H 1.40274900 2.20819200 0.15884700    | H 1.57469400 2.29003900 -0.68778300   |
| H -0.27713800 4.28488100 0.04644400   | H -0.13971700 4.33156000 -0.55717800  |
| C -3.05490700 3.47439200 0.07590100   | C -2.86753900 3.47213500 -0.10386800  |
| C 1.49791600 -0.50056600 0.37887000   | C 1.76010700 -0.40974400 -0.45882400  |
| C 2.22480800 -1.08983600 -0.66212500  | C 2.34926500 -0.97904300 -1.59516100  |
| C 3.60115200 -1.26262400 -0.56795600  | C 3.72778900 -1.12091700 -1.69621700  |
| C 4.27027400 -0.82854000 0.57606400   | C 4.53959200 -0.67621700 -0.65259000  |
| C 3.56766500 -0.23216700 1.62357000   | C 3.97754800 -0.09189300 0.48204600   |
| C 2.19061700 -0.07842200 1.52069700   | C 2.59555300 0.03065100 0.57447700    |
| H 1.70519600 -1.42574700 -1.55113900  | H 1.71746600 -1.32188000 -2.40551900  |
| H 4.14240400 -1.74579200 -1.37138700  | H 4.17862900 -1.56888800 -2.57110400  |
| H 4.09955800 0.09750900 2.50534600    | H 4.60947500 0.27533600 1.28084800    |
| H 1.64304700 0.37762300 2.33650600    | H 2.15788100 0.47861900 1.45824100    |
| C 9.51063400 1.97276300 0.35653500    | C 9.93020000 1.96742700 -0.02920900   |
| C 10.68849900 1.72312100 1.12170000   | C 10.26388100 1.99171700 1.35770900   |
| C 9.89974300 2.16713200 -1.00228300   | C 11.13001700 1.74461100 -0.76799800  |
| C 11.31943800 2.03821900 -1.07711800  | C 12.20646000 1.63257700 0.16253700   |
| C 11.80665500 1.76417400 0.23557000   | C 11.67135200 1.78473400 1.47634900   |
| Fe 10.47683600 0.29032600 -0.35345900 | Fe 10.78586900 0.17111900 0.52751700  |
| C 9.16109400 -1.29523500 -0.19082200  | C 9.40271200 -1.31837000 0.15413900   |
| C 9.55623400 -1.11279100 -1.55607500  | C 10.59486000 -1.54522800 -0.60631500 |
| C 10.34518400 -1.55230600 0.57264300  | C 9.76665100 -1.31229400 1.54009600   |
| C 10.97083100 -1.26456300 -1.63029600 | C 11.68041800 -1.68350000 0.30463300  |
| C 11.45687600 -1.53483600 -0.31669100 | C 11.16987500 -1.54137000 1.62911200  |
| H 8.49857800 1.96322400 0.73169800    | H 8.93752900 2.04912100 -0.44501200   |
| H 10.72289500 1.50353700 2.17752700   | H 9.56929600 2.11046700 2.17496700    |
| H 11.91548700 2.10053300 -1.97444100  | H 13.23748700 1.42913700 -0.08227900  |
| H 12.83555000 1.58141000 0.50446000   | H 12.22705100 1.71805700 2.39892400   |
| H 10.37423200 -1.70397100 1.63935900  | H 9.09877500 -1.13518300 2.36883400   |
| H 12.49053300 -1.66784300 -0.03773100 | H 11.74917000 -1.56378900 2.53898300  |
| H 8.89982500 -0.87601300 -2.37904100  | H 10.64742100 -1.57571300 -1.68247100 |
| H 9.23444600 2.34481700 -1.83307900   | H 11.20355800 1.64072100 -1.83941600  |
| H 11.57134300 -1.15594500 -2.51998200 | H 12.71442600 -1.83455700 0.03629600  |



C -3.95793700 -4.88110800 -0.01292400  
C -4.50785700 -5.68871200 0.94651400  
C -4.53986200 -7.06776500 0.58331800  
H -4.87320800 -5.29989200 1.88785300  
C -4.02035400 -7.29945000 -0.65778600  
H -4.92973400 -7.85056100 1.22035300  
H -3.91818200 -8.23911400 -1.17936900  
C -2.88584100 4.94717300 0.08685800  
C -2.47804400 5.74728100 1.12045500  
C -2.39509200 7.12901200 0.77546600  
H -2.25000300 5.35158100 2.10140600  
C -2.73336100 7.37009500 -0.52502800  
H -2.09988900 7.90686100 1.46715000  
H -2.76116500 8.31366500 -1.04882900  
C -8.33080000 0.57114400 -0.22830800  
C -9.07181000 1.05490200 -1.27326500  
C -10.47146100 1.11184300 -1.00366100  
H -8.62103500 1.35562400 -2.20985200  
C -10.78575000 0.67740200 0.25188300  
H -11.20935400 1.45790200 -1.71525800  
H -11.75785300 0.61060400 0.71667800  
N 5.67958700 -0.99454900 0.68171700  
C 6.61292800 -1.01111100 -0.30812600  
C 7.81117300 -1.20723600 0.34446400  
H 6.36721300 -0.86154000 -1.34395600  
N 6.26912900 -1.17711700 1.88748100  
N 7.54661200 -1.30318300 1.68468300  
S -3.16354600 5.90684300 -1.35186600  
S -9.37091100 0.18709800 1.12789000  
S -3.47809500 -5.83062100 -1.40467900  
Zn -3.42279500 0.03598300 0.05808100

N 5.95164800 -0.82484900 -0.74925400  
C 6.85433600 -1.03964800 0.24578500  
C 8.07260000 -1.10589400 -0.39564500  
H 6.56959700 -1.15283400 1.27631900  
N 6.57825900 -0.76479700 -1.94829600  
N 7.84935700 -0.93519500 -1.73601500  
C -3.59163600 -4.92397400 -0.02907700  
C -4.06503800 -5.59152500 1.10678700  
C -3.23981400 -5.69037000 -1.14650500  
C -4.18112400 -6.97867300 1.12294200  
H -4.33476100 -5.01667000 1.98554500  
C -3.36127600 -7.07709500 -1.12771300  
H -2.87098000 -5.19247700 -2.03614900  
C -3.83499300 -7.74666800 0.00582300  
H -4.54166300 -7.47232300 2.01970300  
H -3.08429000 -7.64775600 -2.00833500  
C -8.09118600 0.44689500 0.32903400  
C -8.84807300 1.00811000 -0.70649200  
C -8.76406400 0.00597900 1.47454900  
C -10.23106500 1.12305300 -0.59813700  
H -8.34655400 1.34747200 -1.60576800  
C -10.14702700 0.12659500 1.58069700  
H -8.19608600 -0.43216800 2.28746300  
C -10.90566900 0.68802200 0.54798000  
H -10.79562400 1.55297900 -1.41932100  
H -10.64409800 -0.22059700 2.48080900  
C -2.74075500 4.96166800 -0.12806600  
C -3.26347100 5.70989800 -1.18956900  
C -2.09076900 5.64650200 0.90538600  
C -3.13772300 7.09604000 -1.21559700  
H -3.76293200 5.19737400 -2.00397900  
C -1.97086600 7.03327600 0.87768500  
H -1.67873100 5.08515400 1.73638200  
C -2.49227500 7.78350900 -0.18191800  
H -3.54280100 7.65167500 -2.05527000  
H -1.46413300 7.54027100 1.69258400  
C -3.99541500 -9.24728200 0.01302900  
H -3.88029900 -9.65562700 1.01962000  
H -4.99077100 -9.53273100 -0.34442600  
H -3.26362800 -9.72972900 -0.63887900  
C -12.40094100 0.84665800 0.67704100  
H -12.65191300 1.82262900 1.10656500  
H -12.89371300 0.78198000 -0.29578000  
H -12.82853400 0.08237900 1.32984400  
C -2.38735600 9.28900700 -0.19557900  
H -2.35156300 9.67666400 -1.21621600  
H -3.25419100 9.74295600 0.29688100  
H -1.49485200 9.63142800 0.33299800  
Zn -3.16176100 0.01589100 -0.05567900
